# Supplementary material
Source: PubMed Central journal article supplement (PMC5032139)
Supplement: NIHMS816108-supplement-SI.pdf [file NIHMS816108-supplement-SI.pdf]

*Supporting Information for*

**Isolation, Characterization, and Reactivity of Fe<sub>8</sub>Me<sub>12</sub>: Kochi's S = 1/2 Species in Iron-Catalyzed Cross-Couplings with MeMgBr and Ferric Salts**

Salvador B. Muñoz III, Stephanie L. Daifuku, William W. Brennessel, and Michael L. Neidig\*

Department of Chemistry, University of Rochester, Rochester, NY 14627 USA

Table of Contents

|                                                                                                                      |     |
|----------------------------------------------------------------------------------------------------------------------|-----|
| 1. Experimental.....                                                                                                 | S2  |
| 1.1 General Considerations .....                                                                                     | S2  |
| 1.2 Preparation of [MgCl(THF) <sub>5</sub> ][Fe <sub>8</sub> Me <sub>12</sub> ] ( <b>1</b> ).....                    | S2  |
| 1.3 Reaction of Ferric Salts with MeMgBr.....                                                                        | S2  |
| 1.4 Preparation of solution MCD samples of <b>1</b> .....                                                            | S2  |
| 1.5 Preparation of solution EPR samples of <b>1</b> .....                                                            | S3  |
| 1.6 Preparation of SilOil mull MCD sample of <b>1</b> .....                                                          | S3  |
| 1.7 Preparation of solid EPR sample of <b>1</b> .....                                                                | S3  |
| 1.8 Reaction of <b>1</b> with electrophile.....                                                                      | S3  |
| 1.9 Reaction of <b>1</b> with electrophile and MeMgBr .....                                                          | S4  |
| 1.10 Thermal stability assessment of <b>1</b> in solution.....                                                       | S4  |
| 1.11 EPR spectroscopy.....                                                                                           | S4  |
| 1.12 MCD spectroscopy.....                                                                                           | S4  |
| 1.13 Mössbauer spectroscopy .....                                                                                    | S5  |
| 1.14 NMR spectroscopy.....                                                                                           | S5  |
| 2. Supplementary Data .....                                                                                          | S6  |
| 2.1 EPR spectra .....                                                                                                | S6  |
| 2.2 MCD spectra .....                                                                                                | S7  |
| 2.3 Mössbauer spectra.....                                                                                           | S7  |
| 2.4 <sup>1</sup> H NMR spectrum of <b>1</b> in THF- <i>d</i> <sub>8</sub> .....                                      | S8  |
| 2.5 Catalytic reaction with β-bromostyrene.....                                                                      | S9  |
| 3. X-ray Crystal Structure Details of [MgCl(THF) <sub>5</sub> ][Fe <sub>8</sub> Me <sub>12</sub> ] ( <b>1</b> )..... | S10 |
| 4. References .....                                                                                                  | S40 |

## 1. Experimental

**1.1 General Considerations.** All reagents were purchased from commercial sources. All air and moisture sensitive manipulations were carried out in an MBraun inert-atmosphere (N<sub>2</sub>) dry box equipped with a direct liquid nitrogen inlet line, or using standard Schlenk techniques. All anhydrous solvents were freshly dried using activated alumina/4Å molecular sieves and stored under inert-atmosphere.

**1.2 Preparation of [MgCl(THF)<sub>5</sub>][Fe<sub>8</sub>Me<sub>12</sub>] (1).** A 20 mL scintillation vial was charged with FeCl<sub>3</sub> (65 mg, 0.4 mmol) and dissolved in THF (1 mL) with stirring. The solution was then cooled to -80 °C. To the green slurry was added a room temperature solution of MeMgBr in THF (1.0 M, 2 mL, 2.0 mmol) dropwise over the course of twenty minutes while stirring. The resulting brown mixture was stirred for an additional thirty minutes at -80 °C, after which the vial was placed on a room temperature stir plate for five minutes bringing the internal temperature of the solution to ca. 0 °C. The reaction mixture was then chilled once again to -80 °C for 30 minutes while stirring. Cold pentane (-80 °C, 2 mL) was added to the scintillation vial and the resulting solution filtered through Celite (precooled to -80 °C). The filtrate was then stored at -80 °C for one week rendering dark yellow brown crystalline shards of **1**.

**\*\*Handling of temperature sensitive crystals of 1 for X-ray diffraction.** Manipulations were carried out inside a nitrogen purged glovebag. Scintillation vials with crystalline material of **1** were stored in an aluminum Pie-Block containing dry ice. A specialized aluminum block with a hollow internal chamber, equipped with an inlet and outlet nozzle, was cooled by the passage of liquid nitrogen through the block. Microscope slides containing SilOil were precooled on the cold aluminum block, upon which an aliquot of cold solution from the scintillation vial was pipetted. Crystalline specimens for X-ray diffraction were examined microscopically. Appropriate single crystals were removed from the glass slide with a goniometer pin and transported to the diffractometer while being held over a hand dewar containing liquid nitrogen.

**1.3 Reactions of Ferric Salts with Grignards.** As an example of the general procedure employed to generate Kochi's  $S = 1/2$  species in-situ, the reaction of FeCl<sub>3</sub> with 20 equiv of MeMgBr is described. A 0.25 mL aliquot of 10 mM FeCl<sub>3</sub> in THF was diluted with 1 mL of THF and 0.75 mL of 2-methyl-THF at room temperature. After drop-wise addition of 0.5 mL of MeMgBr (0.1 M in 2-methyl-THF) at room temperature, the reaction was stirred for 5 minutes before loading and freeze-trapping an EPR sample.

**1.4 Preparation of solution MCD samples of 1.** Scintillation vials containing **1** were transported quickly into a glove box in a liquid nitrogen precooled Pie-Block. The vials were then placed in a cold well at -80 °C and the mother liquor was decanted and discarded. The residual crystalline material was washed with cold pentane (-80 °C, 2mL) and decanted. The washing and decanting process was repeated five times. A small portion of the crystalline material of **1** was dissolved in a 20 mL scintillation vial containing a cold 1:1 mixture of 2-MeTHF and THF (-80 °C, 3 mL). The MCD cell was preassembled and cooled in the cold well. A precooled syringe was used to draw out the amber solution containing **1** and deliver an

appropriate aliquot to the cold MCD cell. The cell was promptly frozen and stored in liquid nitrogen.

**1.5 Preparation of solution EPR samples of 1.** The washing and decanting of the crystalline material was performed as described above. A portion of the crystalline material of **1** was dissolved in a 20 mL scintillation vial containing cold THF (-80 °C, 2 mL). An EPR tube was cooled to -80 °C and a cold syringe was used to deliver 0.25 mL of the cold amber solution to the tube. The EPR tube was then frozen and stored in liquid nitrogen.

**1.6 Preparation of SilOil mull MCD sample of 1.** The washing and decanting of the crystalline material was performed as described above. A mortar and pestle were placed on top of an aluminum block submerged in liquid nitrogen for cooling. A liquid nitrogen chilled metal spatula was used to collect crystalline material from the vial and the frozen crystalline solids were chipped off onto the mortar. A few drops of cold SilOil (-80 °C) were added to the mortar. The mortar was lifted from the aluminum block long enough to allow the SilOil to thaw and the solids were promptly ground with the cold pestle and refrozen. The process was repeated until a fine mull was obtained. A quartz disc was placed on the cold aluminum pie block surface and a cold spatula was used to transfer the frozen mull material onto the disc. The quartz disc was lifted from the aluminum block long enough to allow for the material to thaw and spread thinly over the disc. A second precooled quartz disc was quickly set on top of the first disc and the material refrozen. All components of the MCD cell were precooled in liquid nitrogen then assembled on top of the cold aluminum block.

**1.7 Preparation of solid EPR sample of 1.** The washing and decanting of the crystalline material, **1**, was performed as described above. A liquid nitrogen cooled spatula was used to transfer the crystalline material to an EPR tube submerged in liquid nitrogen. The spatula was cooled once again in liquid nitrogen and used to repeat the transfer process until a sufficient amount of the crystalline material was transferred to the EPR tube. The EPR tube was then stored in liquid nitrogen.

**1.8 Reaction of 1 with electrophile.** Crystalline **1** was dissolved in cold THF (-80 °C, 0.75 mL) and the resulting yellow brown solution was transferred to a scintillation vial equipped with a stir bar and THF (4.25 mL) at room temperature. Soon thereafter an aliquot was collected (0.5 mL) of which a portion was delivered to an EPR tube (0.25 mL). A premeasured solution of THF (0.5 mL) containing dodecane (3.4 mg, 0.02 mmol) and  $\beta$ -bromostyrene (7.3 mg, 0.04 mmol) was delivered to the scintillation vial, containing **1**, while simultaneously freeze quenching the aforementioned EPR tube in liquid nitrogen. Promptly, an aliquot of the resulting reaction mixture (0.5 mL) was collected and a portion (0.25 mL) delivered to an EPR tube with the remainder of the aliquot (0.25 mL) delivered to a GC vial containing a THF/HCl quenching solution (0.75 mL) while simultaneously freeze quenching the EPR sample. The reaction was monitored for five minutes by collection of aliquots for GC analysis and EPR. The initial concentration of **1** in solution was determined by EPR spin integration of the aliquot collected. The yield of the cross-coupling product,  $\beta$ -methylstyrene, was found to be on the order of 6 % (ca. 0.1 min<sup>-1</sup>). Analogous results were obtained across multiple reaction runs.

**1.9 Reaction of 1 with electrophile and MeMgBr.** Crystalline **1** was dissolved in cold THF (-80 °C, 0.75 mL) and the resulting yellow brown solution was transferred to a scintillation vial equipped with a stir bar and THF (4.25 mL) at room temperature. Soon thereafter an aliquot was collected (0.5 mL) of which a portion was delivered to an EPR tube (0.4 mL). A premeasured solution of THF (0.5 mL) containing dodecane (3.4 mg, 0.02 mmol) and  $\beta$ -bromostyrene (7.3 mg, 0.04 mmol) was delivered to the scintillation vial, containing **1**, while simultaneously freeze quenching the EPR tube in liquid nitrogen. An aliquot of the resulting reaction mixture (0.65 mL) was collected and a portion (0.4 mL) delivered to an EPR tube with the remainder of the aliquot (0.25 mL) delivered to a GC vial containing a THF/HCl quenching solution (0.75 mL) while simultaneously freeze quenching the subsequent EPR sample. To the mixture of **1** and  $\beta$ -bromostyrene was quickly added a premeasured aliquot of dilute MeMgBr (0.65 mL, 0.05 mmol) in THF. The reaction was further monitored by collection of GC and EPR samples over the course of five minutes. The initial concentration of **1** in solution was determined by EPR spin integration of the aliquot collected. The conversion of  $\beta$ -bromostyrene to  $\beta$ -methylstyrene was complete within the first 40 seconds of reaction after addition of MeMgBr, yield 99% (ca. 1 min<sup>-1</sup>). Analogous results were obtained across multiple reaction runs.

**1.10 Thermal stability assessment of 1 in solution.** Crystalline material, **1**, was dissolved in cold THF (-80 °C, 0.75 mL). The yellow brown solution was transferred to a scintillation vial containing a stir bar and THF (4.25 mL) at room temperature. Over the course of 5 minutes solution aliquots for EPR were taken at regular time intervals and freeze quenched in liquid nitrogen. The decay of **1** was found to be ca. 25  $\pm$  10 % over five minutes by EPR spin integration.

**1.11 Electron Paramagnetic Resonance (EPR) Spectroscopy.** All samples for EPR spectroscopy were prepared in an inert atmosphere glove box equipped with a liquid nitrogen fill port to enable sample freezing to 77 K within the glove box. EPR samples were prepared in 4 mm OD suprasil quartz EPR tubes from Wilmad Labglass. Samples for spin integration utilized high precision suprasil quartz tubes to allow for direct comparison of intensities between different samples. X-band EPR spectra were recorded on a Bruker EMXplus spectrometer equipped with a 4119HS cavity and an Oxford ESR-900 helium flow cryostat. The instrumental parameters employed for all samples were as follows: 1 mW power; time constant 41 ms; modulation amplitude 8 G; 9.38 GHz; modulation frequency 100 kHz. Samples exhibiting  $S = 1/2$  EPR spectra were spin integrated using a 3 mM CuSO<sub>4</sub> standard under non-saturating conditions. Identical instrumentation parameters were used for both the iron and standard samples.

**1.12 Magnetic Circular Dichroism (MCD) Spectroscopy.** All samples for MCD spectroscopy were prepared in an inert atmosphere glove box equipped with a liquid nitrogen fill port to enable sample freezing to 77 K within the glove box. MCD samples were prepared in 1:1 (v:v) THF:2-MeTHF (to form low temperature optical glasses) in copper cells fitted with quartz disks and a 3 mm gasket. Low temperature near-infrared (NIR) MCD experiments were conducted using a Jasco J-730 spectropolarimeter and a liquid nitrogen cooled InSb detector. The instrument utilizes a modified sample compartment incorporating focusing optics and an Oxford Instruments SM4000-7T superconducting magnet/cryostat. This set-up permits measurements

from 1.6 K to 290 K with magnetic fields up to 7 T. A calibrated Cernox sensor directly inserted in the copper sample holder is used to measure the temperature at the sample to 0.001 K. All MCD spectra were baseline-corrected against zero-field scans.

**1.13 Mössbauer Spectroscopy.** Solution samples for  $^{57}\text{Fe}$  Mössbauer spectroscopy were prepared from  $^{57}\text{Fe}(\text{acac})_3$  to enable data collection from dilute, freeze-trapped solution samples. All samples were prepared in an inert atmosphere glove box equipped with a liquid nitrogen fill port to enable sample freezing to 77 K within the glove box. Each sample was loaded into a Delrin Mössbauer sample cup for measurements and loaded under liquid nitrogen. Low temperature  $^{57}\text{Fe}$  Mössbauer measurements were performed using a See Co. MS4 Mössbauer spectrometer integrated with a Janis SVT-400T He/N<sub>2</sub> cryostat for measurements at 80 K with a 0.07 T applied magnetic field. Isomer shifts were determined relative to  $\alpha\text{-Fe}$  at 298 K. All Mössbauer spectra were fit using the program WMoss (SeeCo). Errors of the fit analyses were the following:  $\delta \pm 0.02$  mm/s and  $\Delta E_Q \pm 3\%$ .

**1.14 NMR Spectroscopy.** A scintillation vial containing crystalline **1** was decanted and washed with cold pentane five times (-80 °C, 7 mL). The residual pentane was removed under reduced pressure by momentarily allowing the sample to warm outside of the cold well (less than 30 seconds) followed by quickly cooling the vial in liquid nitrogen and returning to the cold well. The drying process was repeated five times. The integrity of the material as genuine **1**, after the warm vacuum process, was verified by preparation of an EPR sample from the same dry solid material. A THF-*d*<sub>8</sub> solution from dry crystalline **1** was prepared at -80 °C in a J-Young NMR tube and frozen in liquid nitrogen. The cold NMR tube was loaded into a precooled sample compartment (-80 °C) of a 500 MHz Bruker spectrometer for spectrum collection.

## 2. Supplementary Data

### 2.1 EPR Spectra

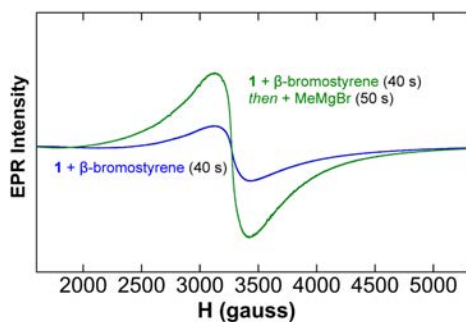

**Figure S1.** 5 K EPR spectrum of increase in **1** upon reaction of the initial **1** +  $\beta$ -bromostyrene solution with MeMgBr (1.25 equiv with respect to  $\beta$ -bromostyrene). The addition of MeMgBr results in near-quantitative re-generation of the initial  $S = 1/2$  signal that was present prior to  $\beta$ -bromostyrene addition.

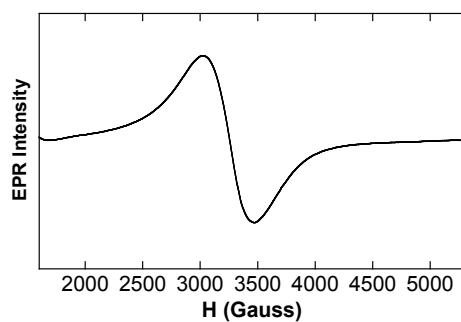

**Figure S2.** 5 K EPR spectrum of solid **1**.

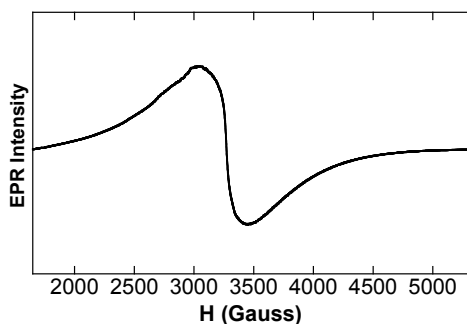

**Figure S3.** 5 K EPR spectrum of the in-situ formed  $S = 1/2$  species from reaction of  $\text{FeCl}_3$  with 20 equiv  $\text{CD}_3\text{MgBr}$  in THF.

## 2.2 MCD Spectra

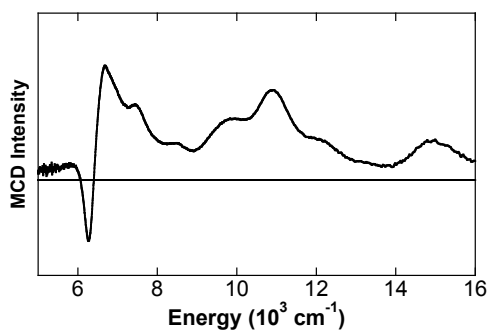

**Figure S4.** 5 K, 7 T NIR MCD Spectrum of Solid Mull of **1**. The solid state spectrum contains the same transitions as observed in solution, but with reduced intensities for the higher energy transitions relative to the lower energy transitions. Such differences in MCD can arise due to changes in bond distances, angles and/or close contact interactions between solution and solid state.

## 2.3 Mössbauer Spectra

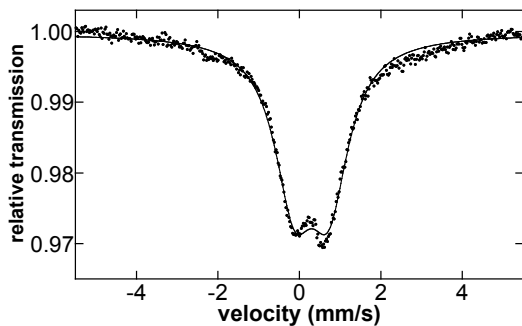

**Figure S5.** 80 K Mössbauer Spectrum of the In-Situ Formed  $S = 1/2$  Iron Species from Reaction of  $^{57}\text{Fe}(\text{acac})_3$  with 20 equiv  $\text{MeMgBr}$  in 1:1 THF:2-MeTHF. The best fit to the broad doublet yielded Mössbauer parameters of  $\delta = 0.30$  mm/s and  $\Delta E_Q = 0.85$  mm/s.

## 2.4 $^1\text{H}$ NMR spectrum of **1** in $\text{THF-}d_8$

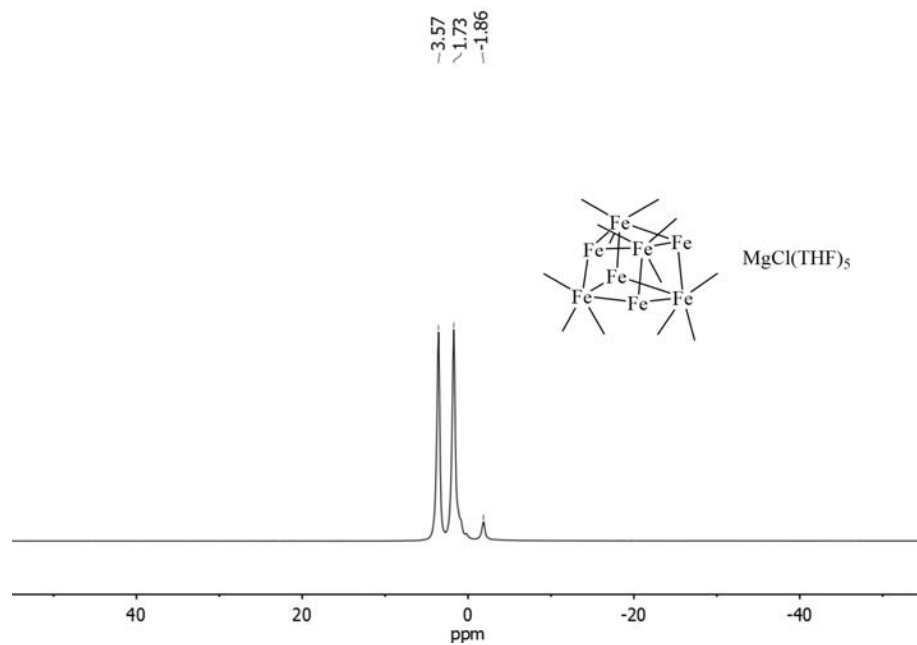

**Figure S6.**  $^1\text{H}$  NMR spectrum of **1** in  $\text{THF-}d_8$  at  $-80\text{ }^\circ\text{C}$ . The  $^1\text{H}$  NMR spectrum of **1** is unremarkable featuring a single broad resonance at  $-1.86\text{ ppm}$  tentatively assigned as a  $\text{Fe-CH}_3$  resonance. No additional resonances were observed between  $220$  to  $-220\text{ ppm}$ .



## 2.5 Catalytic Reaction with $\beta$ -Bromostyrene

Cross-coupling reactions were run with 3 mM  $\text{Fe}(\text{acac})_3$  (1 mol % Fe), 0.3 M  $\beta$ -bromostyrene, and 0.33 M methylmagnesium bromide based off of the previously reported catalytic protocol by Cahiez et al.<sup>1</sup> As an example of a general procedure employed,  $\beta$ -bromostyrene (50  $\mu\text{L}$ , 6 M in THF), dodecane (50  $\mu\text{L}$ , 3 M in THF - used as an internal standard), 320  $\mu\text{L}$  of THF, and  $\text{Fe}(\text{acac})_3$  (0.25 mL, 12 mM in THF) were added together at room temperature. Methylmagnesium bromide (330  $\mu\text{L}$ , 1 M in THF) was added dropwise and then stirred for 15 min. Upon completion, an aliquot of the reaction mixture was added to dilute HCl ( $10^{-5}$  M in diethyl ether), diluted with diethyl ether, and filtered through a pad of silica gel. Product yields were determined by quantitative GC analysis with dodecane as an internal standard

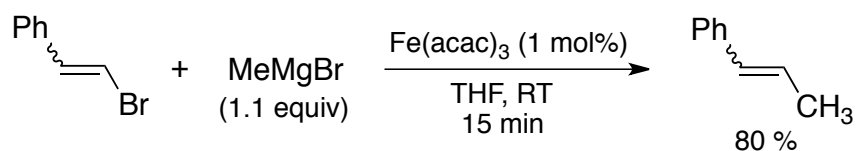

### 3. X-ray Crystal Structure Details of [MgCl(THF)<sub>5</sub>][Fe<sub>8</sub>Me<sub>12</sub>] (1)

#### CRYSTAL STRUCTURE REPORT

C<sub>52</sub> H<sub>116</sub> Br<sub>0.25</sub> Cl<sub>1.75</sub> Fe<sub>8</sub> Mg<sub>1.5</sub> O<sub>10</sub>

or

[MgCl<sub>0.918</sub>Br<sub>0.082</sub>(THF)<sub>5</sub>][Fe<sub>8</sub>(CH<sub>3</sub>)<sub>12</sub>] · ½MgCl<sub>1.666</sub>Br<sub>0.334</sub>(THF)<sub>4</sub> · 3THF

Report prepared for:

Dr. S. Muñoz, Prof. M. Neidig

September 29, 2015

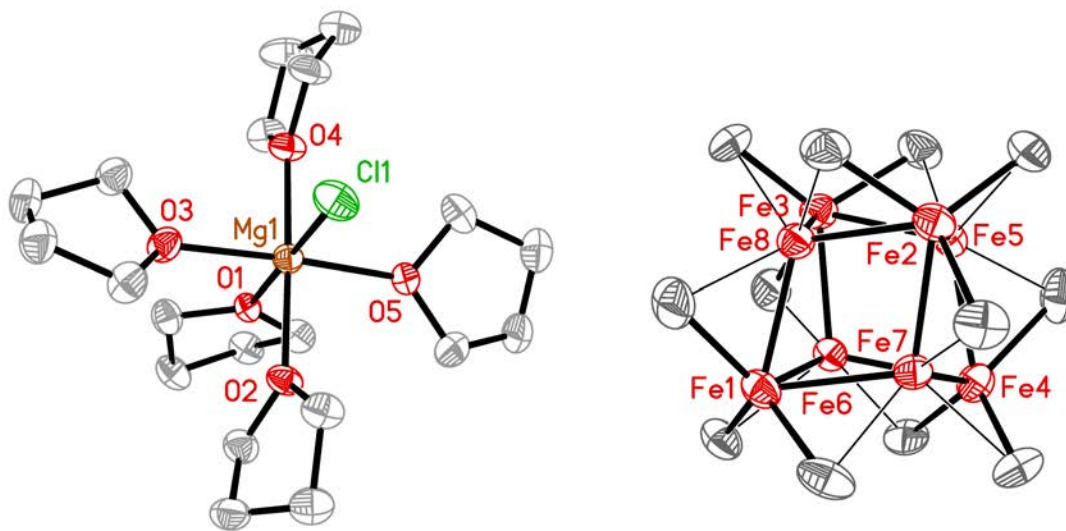

William W. Brennessel

X-ray Crystallographic Facility

Department of Chemistry, University of Rochester

120 Trustee Road

Rochester, NY 14627

### Data collection

A crystal (0.26 x 0.24 x 0.12 mm<sup>3</sup>) was placed onto the tip of a thin glass optical fiber and mounted on a Bruker SMART APEX II CCD platform diffractometer for a data collection at 100.0(5) K.<sup>2</sup> A preliminary set of cell constants and an orientation matrix were calculated from reflections harvested from three orthogonal wedges of reciprocal space. The full data collection was carried out using MoK $\alpha$  radiation (graphite monochromator) with a frame time of 60 seconds and a detector distance of 4.02 cm. A randomly oriented region of reciprocal space was surveyed: four major sections of frames were collected with 0.50° steps in  $\omega$  at four different  $\phi$  settings and a detector position of -38° in  $2\theta$ . The intensity data were corrected for absorption.<sup>3</sup> Final cell constants were calculated from the xyz centroids of 4072 strong reflections from the actual data collection after integration.<sup>4</sup> See Table 1 for additional crystal and refinement information.

### Structure solution and refinement

The structure was solved using SHELXT-2014/5<sup>5</sup> and refined using SHELXL-2014/7.<sup>6</sup> The space group  $P2_12_12$  was determined based on systematic absences. A direct-methods solution was calculated which provided most non-hydrogen atoms from the E-map. Full-matrix least squares / difference Fourier cycles were performed which located the remaining non-hydrogen atoms. All non-hydrogen atoms were refined with anisotropic displacement parameters. Because the hydrogen atoms on the methyl ligands were unable to be located unambiguously in the difference Fourier map, they were not modeled; they were included in the molecular formula, but not in the atom list. All other hydrogen atoms were placed in ideal positions and refined as riding atoms with relative isotropic displacement parameters.

The crystal was an inversion twin (0.51:0.49). Although the current space group was uniquely defined by systematic absence statistics, a refinement in centrosymmetric space group  $Pbam$  was examined and found to produce a significantly worse result.

The final full matrix least squares refinement converged to  $R1 = 0.0551$  ( $F^2$ ,  $I > 2\sigma(I)$ ) and  $wR2 = 0.1560$  ( $F^2$ , all data).

### Structure description

The structure is the one suggested. The asymmetric unit contains one MgX(THF)<sub>5</sub> cation in a general position, one Fe<sub>8</sub>(CH<sub>3</sub>)<sub>12</sub> monoanionic cluster in a general position, one half of a cocrystallized MgX<sub>2</sub>(THF)<sub>4</sub> molecule on a crystallographic two-fold axis that includes the Mg atom, and three uncoordinated cocrystallized THF solvent molecules in general positions. All species are well separated. The halido sites on both Mg species are modeled as site disorders of Cl and Br (0.918:0.082 for Cl1:Br1 and 0.833:0.167 for Cl2:Br2) and THF solvent molecules O9/C45-C48 and O10/C49-C52 are modeled as disordered over two positions each (0.60:0.40 and 0.67:0.33, respectively).

Because the methyl group hydrogen atoms on the ferrate cluster could not be located unambiguously in the difference Fourier map, two possible approaches to placing them were examined initially. The goal in the first model was to angle and rotate each hydrogen trio to minimize H...H close contacts among the twelve methyl groups.

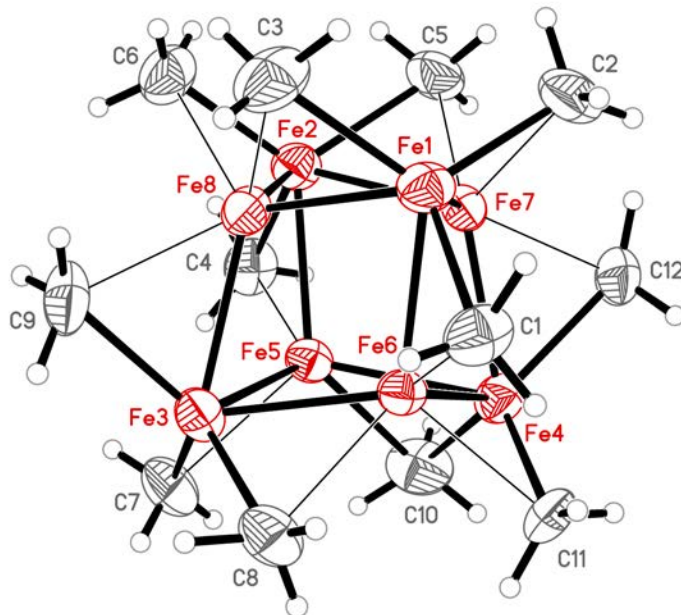

The goal of the second model was to angle and rotate each hydrogen trio such that one C—H bond was within its Fe-C-Fe plane to geometrically favor an agostic interaction. This scenario was consistent with reported structural precedents in which an asymmetric bridging methyl group participates in one Fe—C  $\sigma$  bond and one C—H...Fe  $\eta^2$  agostic interaction.<sup>7</sup>

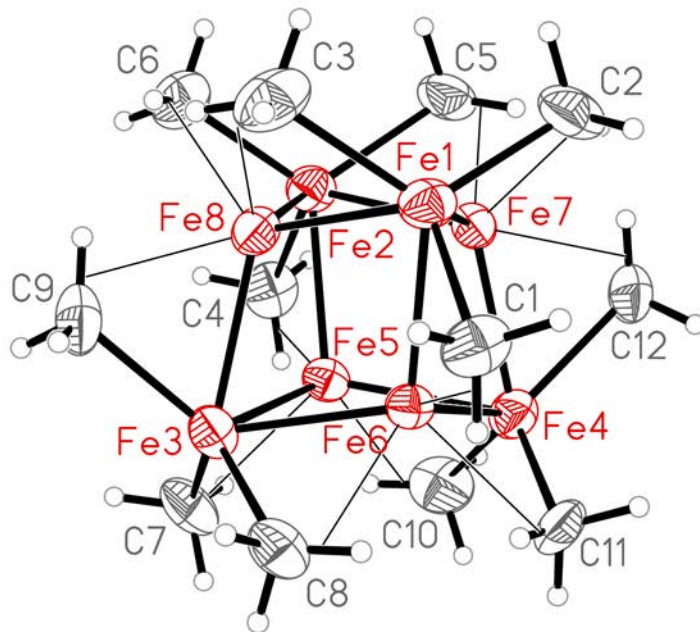

Without independent support (e.g., spectroscopy) for either model, however, it was decided that the hydrogen atoms should be left out of the structure, but still included in the molecular formula to allow for the correct calculation of the various items in Table 1 (e.g., molecular weight, density, etc.).

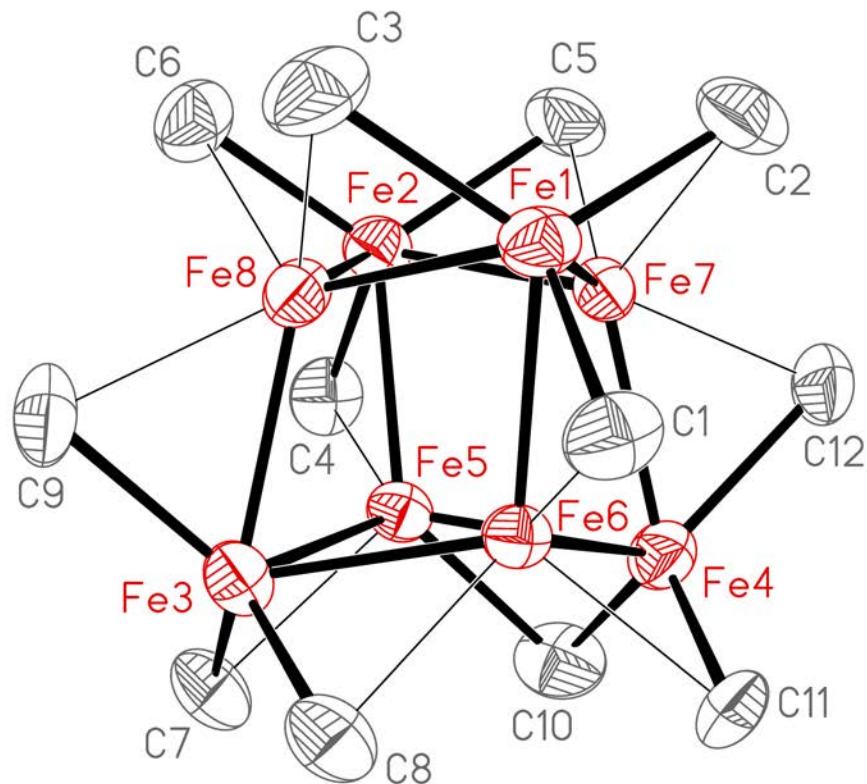

Unless noted otherwise all structural diagrams containing thermal displacement ellipsoids are drawn at the 50 % probability level.

Data collection, structure solution, and structure refinement were conducted at the X-ray Crystallographic Facility, B04 Hutchison Hall, Department of Chemistry, University of Rochester. All publications arising from this report MUST either 1) include William W. Brennessel as a coauthor or 2) acknowledge William W. Brennessel and the X-ray Crystallographic Facility of the Department of Chemistry at the University of Rochester.

Some equations of interest:

$$R_{\text{int}} = \frac{\sum |F_o^2 - \langle F_o^2 \rangle|}{\sum F_o^2}$$

$$R1 = \frac{\sum ||F_o| - |F_c||}{\sum |F_o|}$$

$$wR2 = [\frac{\sum [w(F_o^2 - F_c^2)^2]}{\sum [w(F_o^2)^2]}]^{1/2}$$

where  $w = 1 / [\sigma^2 (F_o^2) + (aP)^2 + bP]$  and

$$P = 1/3 \max (0, F_o^2) + 2/3 F_c^2$$

$$\text{GOF} = S = [\frac{\sum [w(F_o^2 - F_c^2)^2]}{(m-n)}]^{1/2}$$

where  $m$  = number of reflections and  $n$  = number of parameters

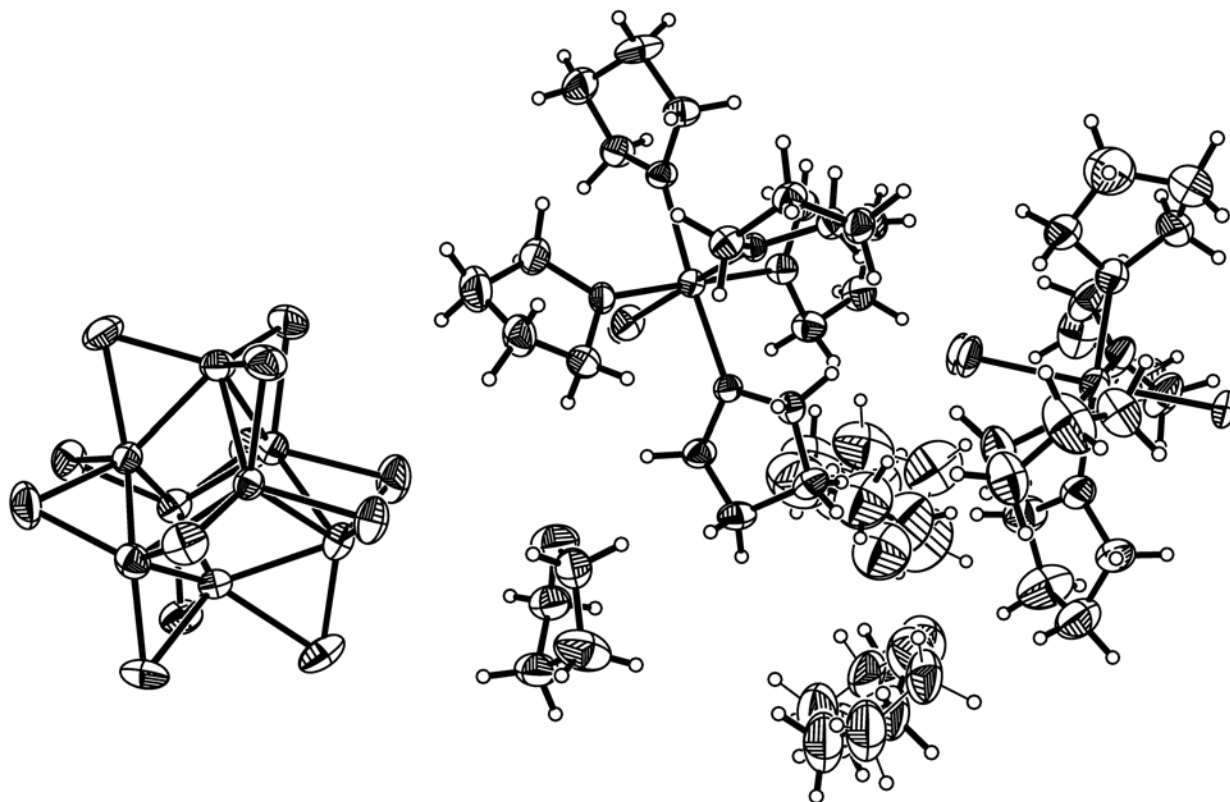

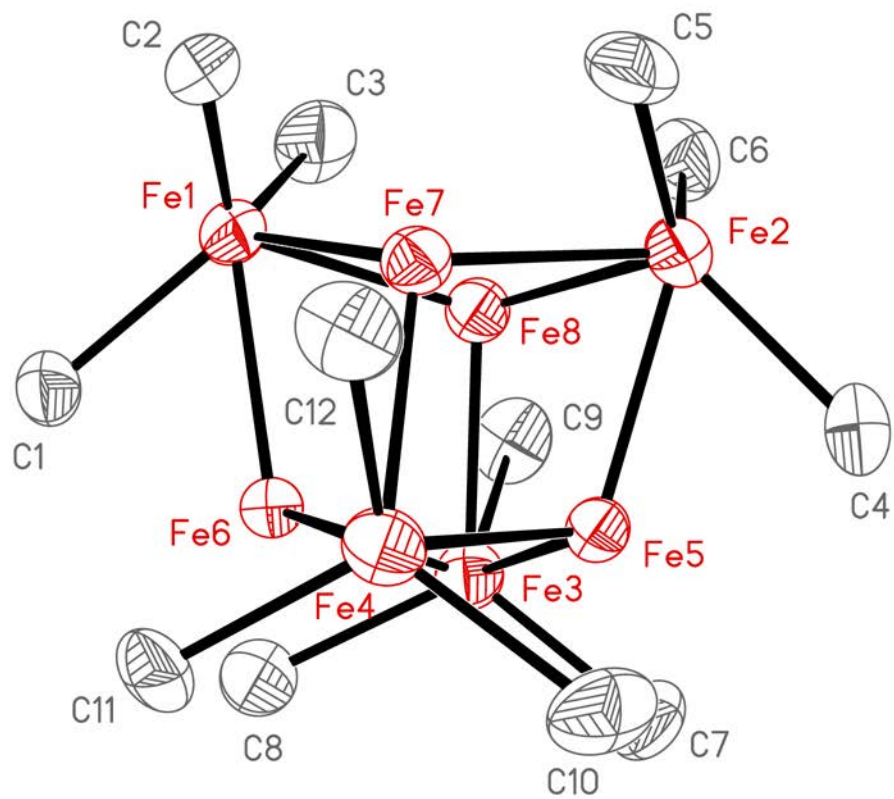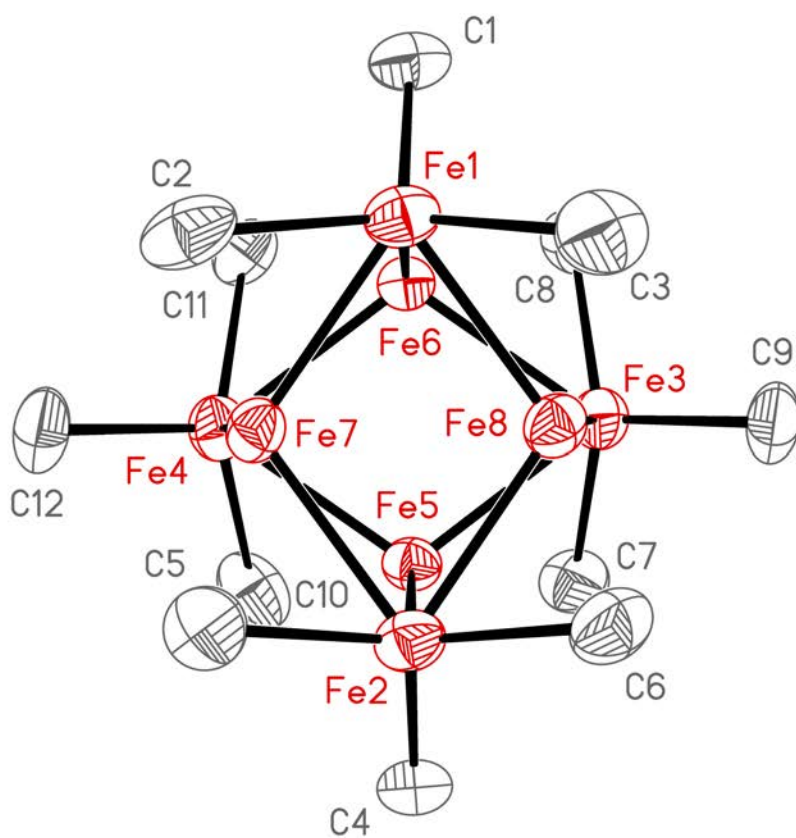

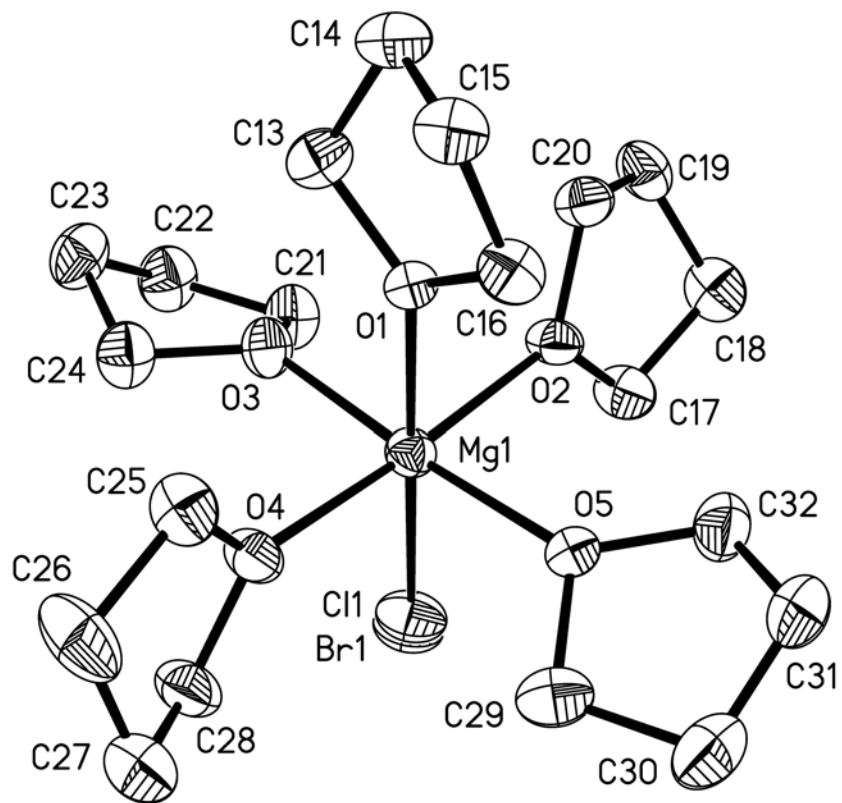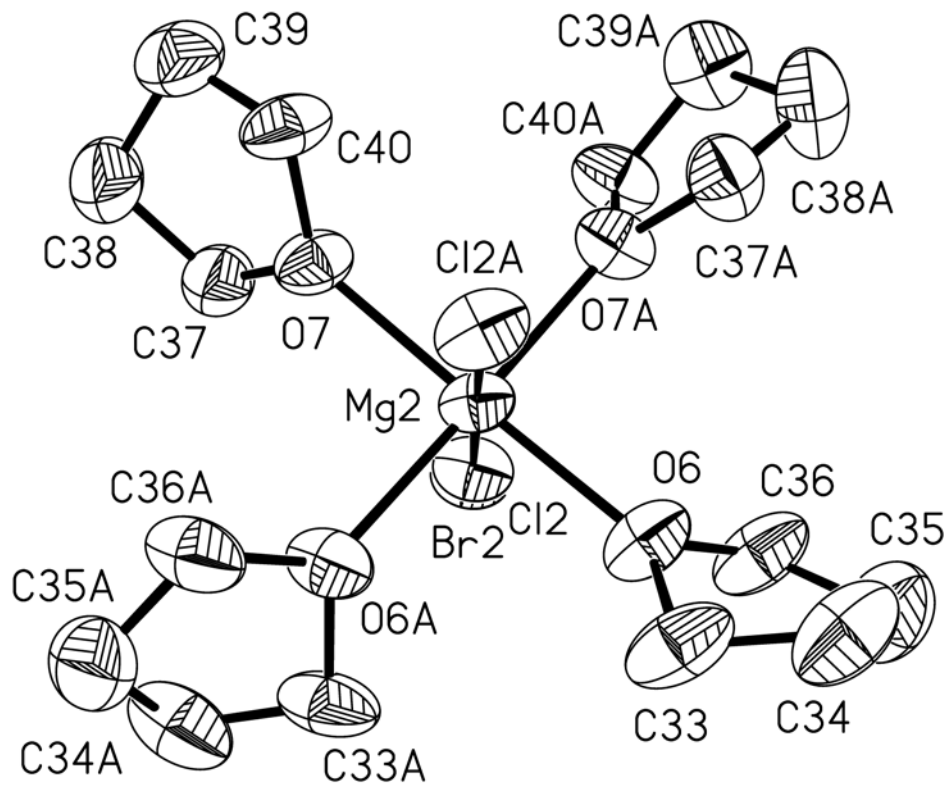



Table S1. Crystal data and structure refinement for neism18h.

|                                        |                                                              |                     |
|----------------------------------------|--------------------------------------------------------------|---------------------|
| Identification code                    | neism18h                                                     |                     |
| Empirical formula                      | C52 H116 Br0.25 Cl1.75 Fe8 Mg1.50 O10                        |                     |
| Formula weight                         | 1466.72                                                      |                     |
| Temperature                            | 100.0(5) K                                                   |                     |
| Wavelength                             | 0.71073 Å                                                    |                     |
| Crystal system                         | orthorhombic                                                 |                     |
| Space group                            | $P2_12_12$                                                   |                     |
| Unit cell dimensions                   | $a = 38.445(4)$ Å                                            | $\alpha = 90^\circ$ |
|                                        | $b = 13.0221(14)$ Å                                          | $\beta = 90^\circ$  |
|                                        | $c = 13.6580(15)$ Å                                          | $\gamma = 90^\circ$ |
| Volume                                 | 6837.6(13) Å <sup>3</sup>                                    |                     |
| Z                                      | 4                                                            |                     |
| Density (calculated)                   | 1.425 Mg/m <sup>3</sup>                                      |                     |
| Absorption coefficient                 | 1.922 mm <sup>-1</sup>                                       |                     |
| $F(000)$                               | 3090                                                         |                     |
| Crystal color, morphology              | yellow-black, block                                          |                     |
| Crystal size                           | 0.26 x 0.24 x 0.12 mm <sup>3</sup>                           |                     |
| Theta range for data collection        | 1.651 to 27.492°                                             |                     |
| Index ranges                           | $-49 \leq h \leq 49, -16 \leq k \leq 16, -17 \leq l \leq 17$ |                     |
| Reflections collected                  | 92013                                                        |                     |
| Independent reflections                | 15680 [ $R(\text{int}) = 0.0665$ ]                           |                     |
| Observed reflections                   | 12489                                                        |                     |
| Completeness to theta = 27.485°        | 99.9%                                                        |                     |
| Absorption correction                  | Multi-scan                                                   |                     |
| Max. and min. transmission             | 0.7456 and 0.6836                                            |                     |
| Refinement method                      | Full-matrix least-squares on $F^2$                           |                     |
| Data / restraints / parameters         | 15680 / 126 / 704                                            |                     |
| Goodness-of-fit on $F^2$               | 1.028                                                        |                     |
| Final $R$ indices [ $I > 2\sigma(I)$ ] | $R1 = 0.0551, wR2 = 0.1451$                                  |                     |
| $R$ indices (all data)                 | $R1 = 0.0715, wR2 = 0.1560$                                  |                     |
| Absolute structure parameter           | 0.49(3)                                                      |                     |
| Largest diff. peak and hole            | 1.111 and -0.453 e.Å <sup>-3</sup>                           |                     |

Table S2. Atomic coordinates ( $\times 10^4$ ) and equivalent isotropic displacement parameters ( $\text{\AA}^2 \times 10^3$ ) for neism18h.  $U_{\text{eq}}$  is defined as one third of the trace of the orthogonalized  $U_{ij}$  tensor.

|     | x        | y        | z       | $U_{\text{eq}}$ |
|-----|----------|----------|---------|-----------------|
| Fe1 | 8160(1)  | 6562(1)  | 4943(1) | 40(1)           |
| Fe2 | 9053(1)  | 7964(1)  | 4771(1) | 40(1)           |
| Fe3 | 8943(1)  | 5245(1)  | 3635(1) | 40(1)           |
| Fe4 | 8957(1)  | 5587(1)  | 6471(1) | 41(1)           |
| Fe5 | 9227(1)  | 6167(1)  | 4958(1) | 33(1)           |
| Fe6 | 8578(1)  | 5162(1)  | 5084(1) | 31(1)           |
| Fe7 | 8658(1)  | 7115(1)  | 5910(1) | 35(1)           |
| Fe8 | 8652(1)  | 6886(1)  | 3873(1) | 36(1)           |
| C1  | 7980(2)  | 5010(6)  | 5051(7) | 49(2)           |
| C2  | 8072(2)  | 7467(7)  | 6225(8) | 57(2)           |
| C3  | 8065(2)  | 7291(8)  | 3561(8) | 64(3)           |
| C4  | 9595(2)  | 7572(7)  | 4786(7) | 51(2)           |
| C5  | 8854(2)  | 8814(6)  | 6002(7) | 53(2)           |
| C6  | 8857(3)  | 8509(7)  | 3400(7) | 55(2)           |
| C7  | 9493(2)  | 5077(8)  | 3802(7) | 54(2)           |
| C8  | 8649(2)  | 3865(7)  | 3922(7) | 51(2)           |
| C9  | 8776(2)  | 6075(8)  | 2362(6) | 57(2)           |
| C10 | 9506(2)  | 5426(8)  | 6293(8) | 63(3)           |
| C11 | 8670(2)  | 4173(6)  | 6465(6) | 49(2)           |
| C12 | 8767(3)  | 6697(7)  | 7535(6) | 55(2)           |
| Mg1 | 6994(1)  | 5502(2)  | 63(2)   | 26(1)           |
| Cl1 | 7260(3)  | 7149(5)  | 194(10) | 42(1)           |
| Br1 | 7273(15) | 7310(20) | 190(50) | 42(1)           |
| O1  | 6747(1)  | 4046(3)  | -44(3)  | 25(1)           |
| C13 | 6440(2)  | 3800(5)  | -638(5) | 34(2)           |
| C14 | 6309(2)  | 2786(5)  | -204(6) | 38(2)           |
| C15 | 6645(2)  | 2252(5)  | 31(6)   | 35(1)           |
| C16 | 6860(2)  | 3131(5)  | 488(5)  | 34(2)           |
| O2  | 6655(1)  | 5786(3)  | 1263(3) | 30(1)           |
| C17 | 6689(2)  | 6643(6)  | 1949(6) | 38(2)           |
| C18 | 6413(2)  | 6444(6)  | 2725(6) | 41(2)           |

|     |          |          |           |        |
|-----|----------|----------|-----------|--------|
| C19 | 6128(2)  | 5909(6)  | 2141(6)   | 39(2)  |
| C20 | 6337(2)  | 5212(6)  | 1485(5)   | 34(1)  |
| O3  | 6611(1)  | 6064(4)  | -880(4)   | 34(1)  |
| C21 | 6391(2)  | 6947(6)  | -590(5)   | 39(2)  |
| C22 | 6209(2)  | 7303(6)  | -1532(6)  | 46(2)  |
| C23 | 6271(2)  | 6434(6)  | -2246(6)  | 43(2)  |
| C24 | 6624(2)  | 6044(6)  | -1937(6)  | 40(2)  |
| O4  | 7310(1)  | 5051(4)  | -1152(3)  | 32(1)  |
| C25 | 7301(2)  | 4084(5)  | -1667(6)  | 38(2)  |
| C26 | 7606(2)  | 4068(7)  | -2372(7)  | 54(2)  |
| C27 | 7842(2)  | 4919(8)  | -1993(6)  | 53(2)  |
| C28 | 7577(2)  | 5693(6)  | -1613(6)  | 43(2)  |
| O5  | 7356(1)  | 4828(4)  | 1039(3)   | 30(1)  |
| C29 | 7727(2)  | 4775(7)  | 801(6)    | 43(2)  |
| C30 | 7911(2)  | 4389(10) | 1724(7)   | 66(3)  |
| C31 | 7621(2)  | 3972(7)  | 2340(6)   | 48(2)  |
| C32 | 7322(2)  | 4682(7)  | 2079(5)   | 44(2)  |
| Mg2 | 5000     | 5000     | -235(3)   | 41(1)  |
| Cl2 | 5601(3)  | 5502(18) | -259(17)  | 48(1)  |
| Br2 | 5651(6)  | 5570(40) | -280(40)  | 48(1)  |
| O6  | 5105(1)  | 3895(5)  | -1306(4)  | 56(2)  |
| C33 | 4895(2)  | 3630(10) | -2165(7)  | 70(3)  |
| C34 | 4925(3)  | 2498(10) | -2204(10) | 85(4)  |
| C35 | 5306(3)  | 2291(10) | -1903(10) | 87(4)  |
| C36 | 5404(2)  | 3201(9)  | -1321(7)  | 68(3)  |
| O7  | 4891(1)  | 6082(5)  | 872(4)    | 50(1)  |
| C37 | 5075(3)  | 7025(7)  | 1040(7)   | 61(2)  |
| C38 | 4856(4)  | 7653(9)  | 1717(10)  | 85(4)  |
| C39 | 4689(3)  | 6840(9)  | 2342(8)   | 72(3)  |
| C40 | 4635(2)  | 5996(8)  | 1625(7)   | 59(2)  |
| O8  | 7180(2)  | 6060(6)  | 4111(5)   | 66(2)  |
| C41 | 7037(2)  | 5268(8)  | 4659(7)   | 57(2)  |
| C42 | 6872(3)  | 5665(9)  | 5549(8)   | 79(3)  |
| C43 | 7062(3)  | 6702(7)  | 5671(7)   | 56(2)  |
| C44 | 7121(3)  | 6969(7)  | 4624(6)   | 52(2)  |
| O9  | 5420(11) | 6120(20) | 3918(18)  | 100(5) |

|      |          |           |          |        |
|------|----------|-----------|----------|--------|
| C45  | 5431(4)  | 5787(15)  | 4906(16) | 71(5)  |
| C46  | 5678(6)  | 6460(20)  | 5375(17) | 103(6) |
| C47  | 5604(5)  | 7458(17)  | 4806(16) | 90(5)  |
| C48  | 5475(7)  | 7160(19)  | 3869(19) | 89(6)  |
| O9'  | 5384(18) | 6280(30)  | 3650(20) | 100(5) |
| C45' | 5343(7)  | 5530(20)  | 4370(20) | 71(5)  |
| C46' | 5517(10) | 5820(30)  | 5240(20) | 103(6) |
| C47' | 5746(9)  | 6730(30)  | 4900(20) | 90(5)  |
| C48' | 5574(11) | 7070(30)  | 4040(30) | 89(6)  |
| O10  | 6187(5)  | 8920(16)  | 882(16)  | 156(7) |
| C49  | 6159(6)  | 9674(14)  | 183(17)  | 113(6) |
| C50  | 5801(5)  | 10177(16) | 81(18)   | 114(6) |
| C51  | 5597(6)  | 9514(18)  | 750(20)  | 131(7) |
| C52  | 5840(6)  | 8642(16)  | 960(20)  | 126(6) |
| O10' | 5662(9)  | 9130(30)  | 1420(20) | 126(6) |
| C49' | 5471(13) | 9770(40)  | 780(30)  | 131(7) |
| C50' | 5534(11) | 9600(40)  | -320(30) | 114(6) |
| C51' | 5921(11) | 9510(30)  | -230(30) | 113(6) |
| C52' | 5957(11) | 9120(60)  | 810(30)  | 156(7) |

---

Table S3. Bond lengths [ $\text{\AA}$ ] and angles [ $^\circ$ ] for neism18h.

|             |            |              |            |
|-------------|------------|--------------|------------|
| Fe(1)-C(2)  | 2.139(10)  | Fe(6)-Fe(8)  | 2.8026(14) |
| Fe(1)-C(1)  | 2.142(8)   | Fe(7)-C(12)  | 2.323(8)   |
| Fe(1)-C(3)  | 2.144(10)  | Fe(7)-C(2)   | 2.337(9)   |
| Fe(1)-Fe(8) | 2.4257(15) | Fe(7)-C(5)   | 2.342(8)   |
| Fe(1)-Fe(7) | 2.4326(15) | Fe(7)-Fe(8)  | 2.7990(15) |
| Fe(1)-Fe(6) | 2.4376(13) | Fe(8)-C(6)   | 2.347(9)   |
| Fe(2)-C(6)  | 2.139(9)   | Fe(8)-C(3)   | 2.355(9)   |
| Fe(2)-C(4)  | 2.145(8)   | Fe(8)-C(9)   | 2.366(9)   |
| Fe(2)-C(5)  | 2.153(9)   | Mg(1)-O(3)   | 2.090(5)   |
| Fe(2)-Fe(8) | 2.4188(15) | Mg(1)-O(5)   | 2.116(5)   |
| Fe(2)-Fe(7) | 2.4401(15) | Mg(1)-O(1)   | 2.125(4)   |
| Fe(2)-Fe(5) | 2.4469(14) | Mg(1)-O(2)   | 2.127(5)   |
| Fe(3)-C(7)  | 2.135(9)   | Mg(1)-O(4)   | 2.138(5)   |
| Fe(3)-C(9)  | 2.145(9)   | Mg(1)-Cl(1)  | 2.382(5)   |
| Fe(3)-C(8)  | 2.160(9)   | Mg(1)-Br(1)  | 2.59(2)    |
| Fe(3)-Fe(5) | 2.4274(15) | O(1)-C(16)   | 1.461(8)   |
| Fe(3)-Fe(6) | 2.4285(14) | O(1)-C(13)   | 1.467(8)   |
| Fe(3)-Fe(8) | 2.4343(15) | C(13)-C(14)  | 1.533(10)  |
| Fe(4)-C(10) | 2.137(10)  | C(13)-H(13A) | 0.9900     |
| Fe(4)-C(11) | 2.146(8)   | C(13)-H(13B) | 0.9900     |
| Fe(4)-C(12) | 2.175(8)   | C(14)-C(15)  | 1.502(9)   |
| Fe(4)-Fe(7) | 2.4219(15) | C(14)-H(14A) | 0.9900     |
| Fe(4)-Fe(5) | 2.4335(16) | C(14)-H(14B) | 0.9900     |
| Fe(4)-Fe(6) | 2.4514(15) | C(15)-C(16)  | 1.541(10)  |
| Fe(5)-C(4)  | 2.325(8)   | C(15)-H(15A) | 0.9900     |
| Fe(5)-C(10) | 2.326(9)   | C(15)-H(15B) | 0.9900     |
| Fe(5)-C(7)  | 2.356(8)   | C(16)-H(16A) | 0.9900     |
| Fe(5)-Fe(6) | 2.8203(13) | C(16)-H(16B) | 0.9900     |
| Fe(5)-Fe(8) | 2.8204(15) | O(2)-C(17)   | 1.463(8)   |
| Fe(5)-Fe(7) | 2.8295(14) | O(2)-C(20)   | 1.467(8)   |
| Fe(6)-C(11) | 2.311(8)   | C(17)-C(18)  | 1.523(10)  |
| Fe(6)-C(1)  | 2.312(7)   | C(17)-H(17A) | 0.9900     |
| Fe(6)-C(8)  | 2.332(8)   | C(17)-H(17B) | 0.9900     |
| Fe(6)-Fe(7) | 2.7988(14) | C(18)-C(19)  | 1.525(11)  |

|              |           |               |           |
|--------------|-----------|---------------|-----------|
| C(18)-H(18A) | 0.9900    | C(29)-H(29A)  | 0.9900    |
| C(18)-H(18B) | 0.9900    | C(29)-H(29B)  | 0.9900    |
| C(19)-C(20)  | 1.506(10) | C(30)-C(31)   | 1.498(13) |
| C(19)-H(19A) | 0.9900    | C(30)-H(30A)  | 0.9900    |
| C(19)-H(19B) | 0.9900    | C(30)-H(30B)  | 0.9900    |
| C(20)-H(20A) | 0.9900    | C(31)-C(32)   | 1.519(11) |
| C(20)-H(20B) | 0.9900    | C(31)-H(31A)  | 0.9900    |
| O(3)-C(24)   | 1.445(9)  | C(31)-H(31B)  | 0.9900    |
| O(3)-C(21)   | 1.481(8)  | C(32)-H(32A)  | 0.9900    |
| C(21)-C(22)  | 1.536(11) | C(32)-H(32B)  | 0.9900    |
| C(21)-H(21A) | 0.9900    | Mg(2)-O(6)    | 2.092(6)  |
| C(21)-H(21B) | 0.9900    | Mg(2)-O(6)#1  | 2.092(6)  |
| C(22)-C(23)  | 1.512(12) | Mg(2)-O(7)#1  | 2.109(6)  |
| C(22)-H(22A) | 0.9900    | Mg(2)-O(7)    | 2.109(6)  |
| C(22)-H(22B) | 0.9900    | Mg(2)-Cl(2)   | 2.402(8)  |
| C(23)-C(24)  | 1.512(10) | Mg(2)-Cl(2)#1 | 2.402(8)  |
| C(23)-H(23A) | 0.9900    | Mg(2)-Br(2)   | 2.611(19) |
| C(23)-H(23B) | 0.9900    | Mg(2)-Br(2)#1 | 2.611(19) |
| C(24)-H(24A) | 0.9900    | O(6)-C(36)    | 1.462(11) |
| C(24)-H(24B) | 0.9900    | O(6)-C(33)    | 1.465(10) |
| O(4)-C(25)   | 1.442(8)  | C(33)-C(34)   | 1.479(17) |
| O(4)-C(28)   | 1.467(8)  | C(33)-H(33A)  | 0.9900    |
| C(25)-C(26)  | 1.517(11) | C(33)-H(33B)  | 0.9900    |
| C(25)-H(25A) | 0.9900    | C(34)-C(35)   | 1.544(16) |
| C(25)-H(25B) | 0.9900    | C(34)-H(34A)  | 0.9900    |
| C(26)-C(27)  | 1.523(13) | C(34)-H(34B)  | 0.9900    |
| C(26)-H(26A) | 0.9900    | C(35)-C(36)   | 1.477(16) |
| C(26)-H(26B) | 0.9900    | C(35)-H(35A)  | 0.9900    |
| C(27)-C(28)  | 1.524(12) | C(35)-H(35B)  | 0.9900    |
| C(27)-H(27A) | 0.9900    | C(36)-H(36A)  | 0.9900    |
| C(27)-H(27B) | 0.9900    | C(36)-H(36B)  | 0.9900    |
| C(28)-H(28A) | 0.9900    | O(7)-C(40)    | 1.427(10) |
| C(28)-H(28B) | 0.9900    | O(7)-C(37)    | 1.438(11) |
| O(5)-C(32)   | 1.440(8)  | C(37)-C(38)   | 1.494(14) |
| O(5)-C(29)   | 1.467(8)  | C(37)-H(37A)  | 0.9900    |
| C(29)-C(30)  | 1.531(12) | C(37)-H(37B)  | 0.9900    |

|              |           |               |           |
|--------------|-----------|---------------|-----------|
| C(38)-C(39)  | 1.503(15) | C(45')-C(46') | 1.41(2)   |
| C(38)-H(38A) | 0.9900    | C(45')-H(45C) | 0.9900    |
| C(38)-H(38B) | 0.9900    | C(45')-H(45D) | 0.9900    |
| C(39)-C(40)  | 1.487(14) | C(46')-C(47') | 1.55(4)   |
| C(39)-H(39A) | 0.9900    | C(46')-H(46C) | 0.9900    |
| C(39)-H(39B) | 0.9900    | C(46')-H(46D) | 0.9900    |
| C(40)-H(40A) | 0.9900    | C(47')-C(48') | 1.41(2)   |
| C(40)-H(40B) | 0.9900    | C(47')-H(47C) | 0.9900    |
| O(8)-C(41)   | 1.387(12) | C(47')-H(47D) | 0.9900    |
| O(8)-C(44)   | 1.394(11) | C(48')-H(48C) | 0.9900    |
| C(41)-C(42)  | 1.465(14) | C(48')-H(48D) | 0.9900    |
| C(41)-H(41A) | 0.9900    | O(10)-C(49)   | 1.374(16) |
| C(41)-H(41B) | 0.9900    | O(10)-C(52)   | 1.387(16) |
| C(42)-C(43)  | 1.544(15) | C(49)-C(50)   | 1.533(16) |
| C(42)-H(42A) | 0.9900    | C(49)-H(49A)  | 0.9900    |
| C(42)-H(42B) | 0.9900    | C(49)-H(49B)  | 0.9900    |
| C(43)-C(44)  | 1.490(13) | C(50)-C(51)   | 1.479(18) |
| C(43)-H(43A) | 0.9900    | C(50)-H(50A)  | 0.9900    |
| C(43)-H(43B) | 0.9900    | C(50)-H(50B)  | 0.9900    |
| C(44)-H(44A) | 0.9900    | C(51)-C(52)   | 1.500(16) |
| C(44)-H(44B) | 0.9900    | C(51)-H(51A)  | 0.9900    |
| O(9)-C(48)   | 1.37(2)   | C(51)-H(51B)  | 0.9900    |
| O(9)-C(45)   | 1.42(2)   | C(52)-H(52A)  | 0.9900    |
| C(45)-C(46)  | 1.44(2)   | C(52)-H(52B)  | 0.9900    |
| C(45)-H(45A) | 0.9900    | O(10')-C(52') | 1.413(18) |
| C(45)-H(45B) | 0.9900    | O(10')-C(49') | 1.420(18) |
| C(46)-C(47)  | 1.54(3)   | C(49')-C(50') | 1.530(19) |
| C(46)-H(46A) | 0.9900    | C(49')-H(49C) | 0.9900    |
| C(46)-H(46B) | 0.9900    | C(49')-H(49D) | 0.9900    |
| C(47)-C(48)  | 1.43(2)   | C(50')-C(51') | 1.50(2)   |
| C(47)-H(47A) | 0.9900    | C(50')-H(50C) | 0.9900    |
| C(47)-H(47B) | 0.9900    | C(50')-H(50D) | 0.9900    |
| C(48)-H(48A) | 0.9900    | C(51')-C(52') | 1.508(18) |
| C(48)-H(48B) | 0.9900    | C(51')-H(51C) | 0.9900    |
| O(9')-C(48') | 1.37(2)   | C(51')-H(51D) | 0.9900    |
| O(9')-C(45') | 1.40(2)   | C(52')-H(52C) | 0.9900    |

|                   |          |                   |           |
|-------------------|----------|-------------------|-----------|
| C(52')-H(52D)     | 0.9900   | C(8)-Fe(3)-Fe(5)  | 120.7(2)  |
| C(2)-Fe(1)-C(1)   | 114.3(4) | C(7)-Fe(3)-Fe(6)  | 118.7(3)  |
| C(2)-Fe(1)-C(3)   | 116.7(4) | C(9)-Fe(3)-Fe(6)  | 120.6(2)  |
| C(1)-Fe(1)-C(3)   | 115.0(4) | C(8)-Fe(3)-Fe(6)  | 60.8(2)   |
| C(2)-Fe(1)-Fe(8)  | 121.4(2) | Fe(5)-Fe(3)-Fe(6) | 71.02(4)  |
| C(1)-Fe(1)-Fe(8)  | 117.3(2) | C(7)-Fe(3)-Fe(8)  | 122.1(3)  |
| C(3)-Fe(1)-Fe(8)  | 61.7(3)  | C(9)-Fe(3)-Fe(8)  | 61.8(3)   |
| C(2)-Fe(1)-Fe(7)  | 61.1(3)  | C(8)-Fe(3)-Fe(8)  | 117.7(2)  |
| C(1)-Fe(1)-Fe(7)  | 119.8(2) | Fe(5)-Fe(3)-Fe(8) | 70.92(5)  |
| C(3)-Fe(1)-Fe(7)  | 118.8(3) | Fe(6)-Fe(3)-Fe(8) | 70.39(4)  |
| Fe(8)-Fe(1)-Fe(7) | 70.36(4) | C(10)-Fe(4)-C(11) | 115.1(4)  |
| C(2)-Fe(1)-Fe(6)  | 116.9(3) | C(10)-Fe(4)-C(12) | 118.2(4)  |
| C(1)-Fe(1)-Fe(6)  | 60.2(2)  | C(11)-Fe(4)-C(12) | 113.6(3)  |
| C(3)-Fe(1)-Fe(6)  | 120.9(3) | C(10)-Fe(4)-Fe(7) | 120.9(3)  |
| Fe(8)-Fe(1)-Fe(6) | 70.38(4) | C(11)-Fe(4)-Fe(7) | 117.4(2)  |
| Fe(7)-Fe(1)-Fe(6) | 70.16(4) | C(12)-Fe(4)-Fe(7) | 60.4(2)   |
| C(6)-Fe(2)-C(4)   | 115.4(4) | C(10)-Fe(4)-Fe(5) | 60.8(3)   |
| C(6)-Fe(2)-C(5)   | 112.8(4) | C(11)-Fe(4)-Fe(5) | 118.8(2)  |
| C(4)-Fe(2)-C(5)   | 117.3(4) | C(12)-Fe(4)-Fe(5) | 120.3(3)  |
| C(6)-Fe(2)-Fe(8)  | 61.6(3)  | Fe(7)-Fe(4)-Fe(5) | 71.29(4)  |
| C(4)-Fe(2)-Fe(8)  | 119.1(3) | C(10)-Fe(4)-Fe(6) | 118.4(3)  |
| C(5)-Fe(2)-Fe(8)  | 117.9(3) | C(11)-Fe(4)-Fe(6) | 59.9(2)   |
| C(6)-Fe(2)-Fe(7)  | 119.3(3) | C(12)-Fe(4)-Fe(6) | 117.9(3)  |
| C(4)-Fe(2)-Fe(7)  | 119.4(2) | Fe(7)-Fe(4)-Fe(6) | 70.10(4)  |
| C(5)-Fe(2)-Fe(7)  | 60.9(2)  | Fe(5)-Fe(4)-Fe(6) | 70.53(4)  |
| Fe(8)-Fe(2)-Fe(7) | 70.35(5) | C(4)-Fe(5)-C(10)  | 97.1(4)   |
| C(6)-Fe(2)-Fe(5)  | 120.3(3) | C(4)-Fe(5)-C(7)   | 98.2(3)   |
| C(4)-Fe(2)-Fe(5)  | 60.4(2)  | C(10)-Fe(5)-C(7)  | 94.3(4)   |
| C(5)-Fe(2)-Fe(5)  | 120.5(3) | C(4)-Fe(5)-Fe(3)  | 126.0(2)  |
| Fe(8)-Fe(2)-Fe(5) | 70.85(4) | C(10)-Fe(5)-Fe(3) | 125.9(3)  |
| Fe(7)-Fe(2)-Fe(5) | 70.76(4) | C(7)-Fe(5)-Fe(3)  | 53.0(2)   |
| C(7)-Fe(3)-C(9)   | 115.8(4) | C(4)-Fe(5)-Fe(4)  | 126.1(2)  |
| C(7)-Fe(3)-C(8)   | 114.5(4) | C(10)-Fe(5)-Fe(4) | 53.3(3)   |
| C(9)-Fe(3)-C(8)   | 114.1(4) | C(7)-Fe(5)-Fe(4)  | 124.6(3)  |
| C(7)-Fe(3)-Fe(5)  | 61.8(2)  | Fe(3)-Fe(5)-Fe(4) | 106.69(5) |
| C(9)-Fe(3)-Fe(5)  | 119.3(3) | C(4)-Fe(5)-Fe(2)  | 53.3(2)   |



|                   |           |                   |           |
|-------------------|-----------|-------------------|-----------|
| C(10)-Fe(5)-Fe(2) | 127.2(3)  | C(1)-Fe(6)-Fe(4)  | 128.7(2)  |
| C(7)-Fe(5)-Fe(2)  | 128.7(3)  | C(8)-Fe(6)-Fe(4)  | 128.3(2)  |
| Fe(3)-Fe(5)-Fe(2) | 105.83(5) | Fe(3)-Fe(6)-Fe(4) | 106.10(5) |
| Fe(4)-Fe(5)-Fe(2) | 105.58(5) | Fe(1)-Fe(6)-Fe(4) | 106.45(5) |
| C(4)-Fe(5)-Fe(6)  | 155.4(2)  | C(11)-Fe(6)-Fe(7) | 99.2(2)   |
| C(10)-Fe(5)-Fe(6) | 99.7(3)   | C(1)-Fe(6)-Fe(7)  | 101.2(2)  |
| C(7)-Fe(5)-Fe(6)  | 98.3(2)   | C(8)-Fe(6)-Fe(7)  | 156.8(2)  |
| Fe(3)-Fe(5)-Fe(6) | 54.51(4)  | Fe(3)-Fe(6)-Fe(7) | 103.03(5) |
| Fe(4)-Fe(5)-Fe(6) | 55.03(4)  | Fe(1)-Fe(6)-Fe(7) | 54.84(4)  |
| Fe(2)-Fe(5)-Fe(6) | 102.04(4) | Fe(4)-Fe(6)-Fe(7) | 54.46(4)  |
| C(4)-Fe(5)-Fe(8)  | 99.4(2)   | C(11)-Fe(6)-Fe(8) | 155.9(2)  |
| C(10)-Fe(5)-Fe(8) | 155.7(3)  | C(1)-Fe(6)-Fe(8)  | 99.1(2)   |
| C(7)-Fe(5)-Fe(8)  | 100.8(2)  | C(8)-Fe(6)-Fe(8)  | 99.6(2)   |
| Fe(3)-Fe(5)-Fe(8) | 54.66(4)  | Fe(3)-Fe(6)-Fe(8) | 54.90(4)  |
| Fe(4)-Fe(5)-Fe(8) | 102.40(5) | Fe(1)-Fe(6)-Fe(8) | 54.61(4)  |
| Fe(2)-Fe(5)-Fe(8) | 54.11(4)  | Fe(4)-Fe(6)-Fe(8) | 102.44(5) |
| Fe(6)-Fe(5)-Fe(8) | 59.58(4)  | Fe(7)-Fe(6)-Fe(8) | 59.96(4)  |
| C(4)-Fe(5)-Fe(7)  | 100.0(2)  | C(11)-Fe(6)-Fe(5) | 100.0(2)  |
| C(10)-Fe(5)-Fe(7) | 100.2(3)  | C(1)-Fe(6)-Fe(5)  | 156.8(2)  |
| C(7)-Fe(5)-Fe(7)  | 155.0(2)  | C(8)-Fe(6)-Fe(5)  | 101.1(2)  |
| Fe(3)-Fe(5)-Fe(7) | 102.18(5) | Fe(3)-Fe(6)-Fe(5) | 54.47(4)  |
| Fe(4)-Fe(5)-Fe(7) | 54.17(4)  | Fe(1)-Fe(6)-Fe(5) | 103.34(5) |
| Fe(2)-Fe(5)-Fe(7) | 54.51(4)  | Fe(4)-Fe(6)-Fe(5) | 54.44(4)  |
| Fe(6)-Fe(5)-Fe(7) | 59.39(3)  | Fe(7)-Fe(6)-Fe(5) | 60.47(3)  |
| Fe(8)-Fe(5)-Fe(7) | 59.39(4)  | Fe(8)-Fe(6)-Fe(5) | 60.21(4)  |
| C(11)-Fe(6)-C(1)  | 96.9(3)   | C(12)-Fe(7)-C(2)  | 92.6(4)   |
| C(11)-Fe(6)-C(8)  | 97.7(3)   | C(12)-Fe(7)-C(5)  | 96.4(3)   |
| C(1)-Fe(6)-C(8)   | 92.3(3)   | C(2)-Fe(7)-C(5)   | 96.6(3)   |
| C(11)-Fe(6)-Fe(3) | 127.0(2)  | C(12)-Fe(7)-Fe(4) | 54.5(2)   |
| C(1)-Fe(6)-Fe(3)  | 124.3(2)  | C(2)-Fe(7)-Fe(4)  | 124.1(2)  |
| C(8)-Fe(6)-Fe(3)  | 53.9(2)   | C(5)-Fe(7)-Fe(4)  | 127.3(2)  |
| C(11)-Fe(6)-Fe(1) | 125.6(2)  | C(12)-Fe(7)-Fe(1) | 126.3(3)  |
| C(1)-Fe(6)-Fe(1)  | 53.6(2)   | C(2)-Fe(7)-Fe(1)  | 53.2(3)   |
| C(8)-Fe(6)-Fe(1)  | 124.3(2)  | C(5)-Fe(7)-Fe(1)  | 124.2(3)  |
| Fe(3)-Fe(6)-Fe(1) | 106.45(5) | Fe(4)-Fe(7)-Fe(1) | 107.55(5) |
| C(11)-Fe(6)-Fe(4) | 53.5(2)   | C(12)-Fe(7)-Fe(2) | 127.0(3)  |

|                   |           |                   |           |
|-------------------|-----------|-------------------|-----------|
| C(2)-Fe(7)-Fe(2)  | 128.9(3)  | C(3)-Fe(8)-Fe(3)  | 127.8(3)  |
| C(5)-Fe(7)-Fe(2)  | 53.5(2)   | C(9)-Fe(8)-Fe(3)  | 53.1(2)   |
| Fe(4)-Fe(7)-Fe(2) | 106.15(5) | Fe(2)-Fe(8)-Fe(3) | 106.49(6) |
| Fe(1)-Fe(7)-Fe(2) | 106.07(6) | Fe(1)-Fe(8)-Fe(3) | 106.64(5) |
| C(12)-Fe(7)-Fe(6) | 101.1(2)  | C(6)-Fe(8)-Fe(7)  | 100.1(2)  |
| C(2)-Fe(7)-Fe(6)  | 98.5(2)   | C(3)-Fe(8)-Fe(7)  | 99.4(3)   |
| C(5)-Fe(7)-Fe(6)  | 156.2(2)  | C(9)-Fe(8)-Fe(7)  | 155.9(2)  |
| Fe(4)-Fe(7)-Fe(6) | 55.44(4)  | Fe(2)-Fe(8)-Fe(7) | 55.18(4)  |
| Fe(1)-Fe(7)-Fe(6) | 55.01(4)  | Fe(1)-Fe(8)-Fe(7) | 54.94(4)  |
| Fe(2)-Fe(7)-Fe(6) | 102.83(5) | Fe(3)-Fe(8)-Fe(7) | 102.87(5) |
| C(12)-Fe(7)-Fe(8) | 157.8(2)  | C(6)-Fe(8)-Fe(6)  | 156.6(2)  |
| C(2)-Fe(7)-Fe(8)  | 101.3(3)  | C(3)-Fe(8)-Fe(6)  | 100.9(3)  |
| C(5)-Fe(7)-Fe(8)  | 99.0(2)   | C(9)-Fe(8)-Fe(6)  | 100.2(3)  |
| Fe(4)-Fe(7)-Fe(8) | 103.33(5) | Fe(2)-Fe(8)-Fe(6) | 103.28(5) |
| Fe(1)-Fe(7)-Fe(8) | 54.71(4)  | Fe(1)-Fe(8)-Fe(6) | 55.01(4)  |
| Fe(2)-Fe(7)-Fe(8) | 54.47(4)  | Fe(3)-Fe(8)-Fe(6) | 54.71(4)  |
| Fe(6)-Fe(7)-Fe(8) | 60.09(4)  | Fe(7)-Fe(8)-Fe(6) | 59.95(4)  |
| C(12)-Fe(7)-Fe(5) | 101.4(2)  | C(6)-Fe(8)-Fe(5)  | 100.4(2)  |
| C(2)-Fe(7)-Fe(5)  | 156.2(3)  | C(3)-Fe(8)-Fe(5)  | 156.9(3)  |
| C(5)-Fe(7)-Fe(5)  | 100.8(2)  | C(9)-Fe(8)-Fe(5)  | 98.8(2)   |
| Fe(4)-Fe(7)-Fe(5) | 54.55(4)  | Fe(2)-Fe(8)-Fe(5) | 55.04(4)  |
| Fe(1)-Fe(7)-Fe(5) | 103.21(5) | Fe(1)-Fe(8)-Fe(5) | 103.66(5) |
| Fe(2)-Fe(7)-Fe(5) | 54.73(4)  | Fe(3)-Fe(8)-Fe(5) | 54.42(4)  |
| Fe(6)-Fe(7)-Fe(5) | 60.14(3)  | Fe(7)-Fe(8)-Fe(5) | 60.46(4)  |
| Fe(8)-Fe(7)-Fe(5) | 60.14(4)  | Fe(6)-Fe(8)-Fe(5) | 60.21(3)  |
| C(6)-Fe(8)-C(3)   | 94.0(4)   | Fe(1)-C(1)-Fe(6)  | 66.2(2)   |
| C(6)-Fe(8)-C(9)   | 95.4(3)   | Fe(1)-C(2)-Fe(7)  | 65.7(2)   |
| C(3)-Fe(8)-C(9)   | 97.7(4)   | Fe(1)-C(3)-Fe(8)  | 65.0(2)   |
| C(6)-Fe(8)-Fe(2)  | 53.3(2)   | Fe(2)-C(4)-Fe(5)  | 66.2(2)   |
| C(3)-Fe(8)-Fe(2)  | 124.9(3)  | Fe(2)-C(5)-Fe(7)  | 65.6(2)   |
| C(9)-Fe(8)-Fe(2)  | 125.0(2)  | Fe(2)-C(6)-Fe(8)  | 65.1(2)   |
| C(6)-Fe(8)-Fe(1)  | 125.8(2)  | Fe(3)-C(7)-Fe(5)  | 65.2(2)   |
| C(3)-Fe(8)-Fe(1)  | 53.3(3)   | Fe(3)-C(8)-Fe(6)  | 65.3(2)   |
| C(9)-Fe(8)-Fe(1)  | 127.2(2)  | Fe(3)-C(9)-Fe(8)  | 65.1(2)   |
| Fe(2)-Fe(8)-Fe(1) | 106.97(6) | Fe(4)-C(10)-Fe(5) | 65.9(2)   |
| C(6)-Fe(8)-Fe(3)  | 126.8(2)  | Fe(4)-C(11)-Fe(6) | 66.6(2)   |

|                     |           |                     |          |
|---------------------|-----------|---------------------|----------|
| Fe(4)-C(12)-Fe(7)   | 65.1(2)   | C(14)-C(15)-C(16)   | 101.7(5) |
| O(3)-Mg(1)-O(5)     | 175.3(2)  | C(14)-C(15)-H(15A)  | 111.4    |
| O(3)-Mg(1)-O(1)     | 87.41(19) | C(16)-C(15)-H(15A)  | 111.4    |
| O(5)-Mg(1)-O(1)     | 88.08(18) | C(14)-C(15)-H(15B)  | 111.4    |
| O(3)-Mg(1)-O(2)     | 88.9(2)   | C(16)-C(15)-H(15B)  | 111.4    |
| O(5)-Mg(1)-O(2)     | 89.4(2)   | H(15A)-C(15)-H(15B) | 109.3    |
| O(1)-Mg(1)-O(2)     | 86.24(18) | O(1)-C(16)-C(15)    | 104.3(5) |
| O(3)-Mg(1)-O(4)     | 91.1(2)   | O(1)-C(16)-H(16A)   | 110.9    |
| O(5)-Mg(1)-O(4)     | 90.13(19) | C(15)-C(16)-H(16A)  | 110.9    |
| O(1)-Mg(1)-O(4)     | 87.44(18) | O(1)-C(16)-H(16B)   | 110.9    |
| O(2)-Mg(1)-O(4)     | 173.7(2)  | C(15)-C(16)-H(16B)  | 110.9    |
| O(3)-Mg(1)-Cl(1)    | 91.9(3)   | H(16A)-C(16)-H(16B) | 108.9    |
| O(5)-Mg(1)-Cl(1)    | 92.6(3)   | C(17)-O(2)-C(20)    | 109.3(5) |
| O(1)-Mg(1)-Cl(1)    | 178.8(3)  | C(17)-O(2)-Mg(1)    | 124.8(4) |
| O(2)-Mg(1)-Cl(1)    | 92.7(3)   | C(20)-O(2)-Mg(1)    | 125.6(4) |
| O(4)-Mg(1)-Cl(1)    | 93.6(3)   | O(2)-C(17)-C(18)    | 104.7(6) |
| O(3)-Mg(1)-Br(1)    | 90.8(15)  | O(2)-C(17)-H(17A)   | 110.8    |
| O(5)-Mg(1)-Br(1)    | 93.7(15)  | C(18)-C(17)-H(17A)  | 110.8    |
| O(1)-Mg(1)-Br(1)    | 177.9(14) | O(2)-C(17)-H(17B)   | 110.8    |
| O(2)-Mg(1)-Br(1)    | 92.6(15)  | C(18)-C(17)-H(17B)  | 110.8    |
| O(4)-Mg(1)-Br(1)    | 93.7(15)  | H(17A)-C(17)-H(17B) | 108.9    |
| C(16)-O(1)-C(13)    | 109.5(5)  | C(17)-C(18)-C(19)   | 102.4(6) |
| C(16)-O(1)-Mg(1)    | 124.2(4)  | C(17)-C(18)-H(18A)  | 111.3    |
| C(13)-O(1)-Mg(1)    | 126.3(4)  | C(19)-C(18)-H(18A)  | 111.3    |
| O(1)-C(13)-C(14)    | 103.9(5)  | C(17)-C(18)-H(18B)  | 111.3    |
| O(1)-C(13)-H(13A)   | 111.0     | C(19)-C(18)-H(18B)  | 111.3    |
| C(14)-C(13)-H(13A)  | 111.0     | H(18A)-C(18)-H(18B) | 109.2    |
| O(1)-C(13)-H(13B)   | 111.0     | C(20)-C(19)-C(18)   | 101.8(6) |
| C(14)-C(13)-H(13B)  | 111.0     | C(20)-C(19)-H(19A)  | 111.4    |
| H(13A)-C(13)-H(13B) | 109.0     | C(18)-C(19)-H(19A)  | 111.4    |
| C(15)-C(14)-C(13)   | 101.4(5)  | C(20)-C(19)-H(19B)  | 111.4    |
| C(15)-C(14)-H(14A)  | 111.5     | C(18)-C(19)-H(19B)  | 111.4    |
| C(13)-C(14)-H(14A)  | 111.5     | H(19A)-C(19)-H(19B) | 109.3    |
| C(15)-C(14)-H(14B)  | 111.5     | O(2)-C(20)-C(19)    | 105.1(6) |
| C(13)-C(14)-H(14B)  | 111.5     | O(2)-C(20)-H(20A)   | 110.7    |
| H(14A)-C(14)-H(14B) | 109.3     | C(19)-C(20)-H(20A)  | 110.7    |

|                     |          |                     |          |
|---------------------|----------|---------------------|----------|
| O(2)-C(20)-H(20B)   | 110.7    | O(4)-C(25)-H(25B)   | 110.2    |
| C(19)-C(20)-H(20B)  | 110.7    | C(26)-C(25)-H(25B)  | 110.2    |
| H(20A)-C(20)-H(20B) | 108.8    | H(25A)-C(25)-H(25B) | 108.5    |
| C(24)-O(3)-C(21)    | 107.6(5) | C(25)-C(26)-C(27)   | 103.5(6) |
| C(24)-O(3)-Mg(1)    | 125.7(4) | C(25)-C(26)-H(26A)  | 111.1    |
| C(21)-O(3)-Mg(1)    | 120.7(4) | C(27)-C(26)-H(26A)  | 111.1    |
| O(3)-C(21)-C(22)    | 105.6(6) | C(25)-C(26)-H(26B)  | 111.1    |
| O(3)-C(21)-H(21A)   | 110.6    | C(27)-C(26)-H(26B)  | 111.1    |
| C(22)-C(21)-H(21A)  | 110.6    | H(26A)-C(26)-H(26B) | 109.0    |
| O(3)-C(21)-H(21B)   | 110.6    | C(26)-C(27)-C(28)   | 101.5(6) |
| C(22)-C(21)-H(21B)  | 110.6    | C(26)-C(27)-H(27A)  | 111.5    |
| H(21A)-C(21)-H(21B) | 108.7    | C(28)-C(27)-H(27A)  | 111.5    |
| C(23)-C(22)-C(21)   | 104.1(6) | C(26)-C(27)-H(27B)  | 111.5    |
| C(23)-C(22)-H(22A)  | 110.9    | C(28)-C(27)-H(27B)  | 111.5    |
| C(21)-C(22)-H(22A)  | 110.9    | H(27A)-C(27)-H(27B) | 109.3    |
| C(23)-C(22)-H(22B)  | 110.9    | O(4)-C(28)-C(27)    | 103.7(7) |
| C(21)-C(22)-H(22B)  | 110.9    | O(4)-C(28)-H(28A)   | 111.0    |
| H(22A)-C(22)-H(22B) | 109.0    | C(27)-C(28)-H(28A)  | 111.0    |
| C(22)-C(23)-C(24)   | 102.3(6) | O(4)-C(28)-H(28B)   | 111.0    |
| C(22)-C(23)-H(23A)  | 111.3    | C(27)-C(28)-H(28B)  | 111.0    |
| C(24)-C(23)-H(23A)  | 111.3    | H(28A)-C(28)-H(28B) | 109.0    |
| C(22)-C(23)-H(23B)  | 111.3    | C(32)-O(5)-C(29)    | 107.5(5) |
| C(24)-C(23)-H(23B)  | 111.3    | C(32)-O(5)-Mg(1)    | 128.1(4) |
| H(23A)-C(23)-H(23B) | 109.2    | C(29)-O(5)-Mg(1)    | 121.3(4) |
| O(3)-C(24)-C(23)    | 103.9(6) | O(5)-C(29)-C(30)    | 106.4(7) |
| O(3)-C(24)-H(24A)   | 111.0    | O(5)-C(29)-H(29A)   | 110.4    |
| C(23)-C(24)-H(24A)  | 111.0    | C(30)-C(29)-H(29A)  | 110.4    |
| O(3)-C(24)-H(24B)   | 111.0    | O(5)-C(29)-H(29B)   | 110.4    |
| C(23)-C(24)-H(24B)  | 111.0    | C(30)-C(29)-H(29B)  | 110.4    |
| H(24A)-C(24)-H(24B) | 109.0    | H(29A)-C(29)-H(29B) | 108.6    |
| C(25)-O(4)-C(28)    | 107.7(5) | C(31)-C(30)-C(29)   | 103.8(7) |
| C(25)-O(4)-Mg(1)    | 127.2(4) | C(31)-C(30)-H(30A)  | 111.0    |
| C(28)-O(4)-Mg(1)    | 125.0(4) | C(29)-C(30)-H(30A)  | 111.0    |
| O(4)-C(25)-C(26)    | 107.7(6) | C(31)-C(30)-H(30B)  | 111.0    |
| O(4)-C(25)-H(25A)   | 110.2    | C(29)-C(30)-H(30B)  | 111.0    |
| C(26)-C(25)-H(25A)  | 110.2    | H(30A)-C(30)-H(30B) | 109.0    |

|                      |           |                     |           |
|----------------------|-----------|---------------------|-----------|
| C(30)-C(31)-C(32)    | 102.2(7)  | C(36)-O(6)-C(33)    | 106.0(7)  |
| C(30)-C(31)-H(31A)   | 111.3     | C(36)-O(6)-Mg(2)    | 125.9(5)  |
| C(32)-C(31)-H(31A)   | 111.3     | C(33)-O(6)-Mg(2)    | 128.1(5)  |
| C(30)-C(31)-H(31B)   | 111.3     | O(6)-C(33)-C(34)    | 102.8(9)  |
| C(32)-C(31)-H(31B)   | 111.3     | O(6)-C(33)-H(33A)   | 111.2     |
| H(31A)-C(31)-H(31B)  | 109.2     | C(34)-C(33)-H(33A)  | 111.2     |
| O(5)-C(32)-C(31)     | 104.0(6)  | O(6)-C(33)-H(33B)   | 111.2     |
| O(5)-C(32)-H(32A)    | 110.9     | C(34)-C(33)-H(33B)  | 111.2     |
| C(31)-C(32)-H(32A)   | 110.9     | H(33A)-C(33)-H(33B) | 109.1     |
| O(5)-C(32)-H(32B)    | 110.9     | C(33)-C(34)-C(35)   | 103.8(10) |
| C(31)-C(32)-H(32B)   | 110.9     | C(33)-C(34)-H(34A)  | 111.0     |
| H(32A)-C(32)-H(32B)  | 109.0     | C(35)-C(34)-H(34A)  | 111.0     |
| O(6)-Mg(2)-O(6)#1    | 91.2(4)   | C(33)-C(34)-H(34B)  | 111.0     |
| O(6)-Mg(2)-O(7)#1    | 90.2(2)   | C(35)-C(34)-H(34B)  | 111.0     |
| O(6)#1-Mg(2)-O(7)#1  | 178.4(3)  | H(34A)-C(34)-H(34B) | 109.0     |
| O(6)-Mg(2)-O(7)      | 178.4(3)  | C(36)-C(35)-C(34)   | 104.2(9)  |
| O(6)#1-Mg(2)-O(7)    | 90.2(2)   | C(36)-C(35)-H(35A)  | 110.9     |
| O(7)#1-Mg(2)-O(7)    | 88.4(4)   | C(34)-C(35)-H(35A)  | 110.9     |
| O(6)-Mg(2)-Cl(2)     | 89.5(6)   | C(36)-C(35)-H(35B)  | 110.9     |
| O(6)#1-Mg(2)-Cl(2)   | 89.3(6)   | C(34)-C(35)-H(35B)  | 110.9     |
| O(7)#1-Mg(2)-Cl(2)   | 90.0(6)   | H(35A)-C(35)-H(35B) | 108.9     |
| O(7)-Mg(2)-Cl(2)     | 91.2(6)   | O(6)-C(36)-C(35)    | 107.6(8)  |
| O(6)-Mg(2)-Cl(2)#1   | 89.3(6)   | O(6)-C(36)-H(36A)   | 110.2     |
| O(6)#1-Mg(2)-Cl(2)#1 | 89.5(6)   | C(35)-C(36)-H(36A)  | 110.2     |
| O(7)#1-Mg(2)-Cl(2)#1 | 91.2(6)   | O(6)-C(36)-H(36B)   | 110.2     |
| O(7)-Mg(2)-Cl(2)#1   | 90.0(6)   | C(35)-C(36)-H(36B)  | 110.2     |
| Cl(2)-Mg(2)-Cl(2)#1  | 178.4(11) | H(36A)-C(36)-H(36B) | 108.5     |
| O(6)-Mg(2)-Br(2)     | 89.6(12)  | C(40)-O(7)-C(37)    | 107.0(7)  |
| O(6)#1-Mg(2)-Br(2)   | 88.5(11)  | C(40)-O(7)-Mg(2)    | 127.0(5)  |
| O(7)#1-Mg(2)-Br(2)   | 90.8(11)  | C(37)-O(7)-Mg(2)    | 125.9(5)  |
| O(7)-Mg(2)-Br(2)     | 91.2(12)  | O(7)-C(37)-C(38)    | 106.7(8)  |
| O(6)-Mg(2)-Br(2)#1   | 88.5(11)  | O(7)-C(37)-H(37A)   | 110.4     |
| O(6)#1-Mg(2)-Br(2)#1 | 89.6(12)  | C(38)-C(37)-H(37A)  | 110.4     |
| O(7)#1-Mg(2)-Br(2)#1 | 91.2(12)  | O(7)-C(37)-H(37B)   | 110.4     |
| O(7)-Mg(2)-Br(2)#1   | 90.8(11)  | C(38)-C(37)-H(37B)  | 110.4     |
| Br(2)-Mg(2)-Br(2)#1  | 177(2)    | H(37A)-C(37)-H(37B) | 108.6     |

|                     |          |                      |           |
|---------------------|----------|----------------------|-----------|
| C(37)-C(38)-C(39)   | 102.0(9) | H(43A)-C(43)-H(43B)  | 109.5     |
| C(37)-C(38)-H(38A)  | 111.4    | O(8)-C(44)-C(43)     | 108.0(8)  |
| C(39)-C(38)-H(38A)  | 111.4    | O(8)-C(44)-H(44A)    | 110.1     |
| C(37)-C(38)-H(38B)  | 111.4    | C(43)-C(44)-H(44A)   | 110.1     |
| C(39)-C(38)-H(38B)  | 111.4    | O(8)-C(44)-H(44B)    | 110.1     |
| H(38A)-C(38)-H(38B) | 109.2    | C(43)-C(44)-H(44B)   | 110.1     |
| C(40)-C(39)-C(38)   | 101.9(9) | H(44A)-C(44)-H(44B)  | 108.4     |
| C(40)-C(39)-H(39A)  | 111.4    | C(48)-O(9)-C(45)     | 110(2)    |
| C(38)-C(39)-H(39A)  | 111.4    | O(9)-C(45)-C(46)     | 104.6(17) |
| C(40)-C(39)-H(39B)  | 111.4    | O(9)-C(45)-H(45A)    | 110.8     |
| C(38)-C(39)-H(39B)  | 111.4    | C(46)-C(45)-H(45A)   | 110.8     |
| H(39A)-C(39)-H(39B) | 109.2    | O(9)-C(45)-H(45B)    | 110.8     |
| O(7)-C(40)-C(39)    | 108.7(8) | C(46)-C(45)-H(45B)   | 110.8     |
| O(7)-C(40)-H(40A)   | 110.0    | H(45A)-C(45)-H(45B)  | 108.9     |
| C(39)-C(40)-H(40A)  | 110.0    | C(45)-C(46)-C(47)    | 99.7(14)  |
| O(7)-C(40)-H(40B)   | 110.0    | C(45)-C(46)-H(46A)   | 111.8     |
| C(39)-C(40)-H(40B)  | 110.0    | C(47)-C(46)-H(46A)   | 111.8     |
| H(40A)-C(40)-H(40B) | 108.3    | C(45)-C(46)-H(46B)   | 111.8     |
| C(41)-O(8)-C(44)    | 107.3(7) | C(47)-C(46)-H(46B)   | 111.8     |
| O(8)-C(41)-C(42)    | 110.9(9) | H(46A)-C(46)-H(46B)  | 109.6     |
| O(8)-C(41)-H(41A)   | 109.5    | C(48)-C(47)-C(46)    | 106.8(16) |
| C(42)-C(41)-H(41A)  | 109.5    | C(48)-C(47)-H(47A)   | 110.4     |
| O(8)-C(41)-H(41B)   | 109.5    | C(46)-C(47)-H(47A)   | 110.4     |
| C(42)-C(41)-H(41B)  | 109.5    | C(48)-C(47)-H(47B)   | 110.4     |
| H(41A)-C(41)-H(41B) | 108.1    | C(46)-C(47)-H(47B)   | 110.4     |
| C(41)-C(42)-C(43)   | 101.2(9) | H(47A)-C(47)-H(47B)  | 108.6     |
| C(41)-C(42)-H(42A)  | 111.5    | O(9)-C(48)-C(47)     | 106.2(17) |
| C(43)-C(42)-H(42A)  | 111.5    | O(9)-C(48)-H(48A)    | 110.5     |
| C(41)-C(42)-H(42B)  | 111.5    | C(47)-C(48)-H(48A)   | 110.5     |
| C(43)-C(42)-H(42B)  | 111.5    | O(9)-C(48)-H(48B)    | 110.5     |
| H(42A)-C(42)-H(42B) | 109.4    | C(47)-C(48)-H(48B)   | 110.5     |
| C(44)-C(43)-C(42)   | 100.0(8) | H(48A)-C(48)-H(48B)  | 108.7     |
| C(44)-C(43)-H(43A)  | 111.8    | C(48')-O(9')-C(45')  | 108(2)    |
| C(42)-C(43)-H(43A)  | 111.8    | O(9')-C(45')-C(46')  | 111(2)    |
| C(44)-C(43)-H(43B)  | 111.8    | O(9')-C(45')-H(45C)  | 109.5     |
| C(42)-C(43)-H(43B)  | 111.8    | C(46')-C(45')-H(45C) | 109.5     |

|                      |           |                      |           |
|----------------------|-----------|----------------------|-----------|
| O(9')-C(45')-H(45D)  | 109.5     | C(52)-C(51)-H(51A)   | 111.1     |
| C(46')-C(45')-H(45D) | 109.5     | C(50)-C(51)-H(51B)   | 111.1     |
| H(45C)-C(45')-H(45D) | 108.1     | C(52)-C(51)-H(51B)   | 111.1     |
| C(45')-C(46')-C(47') | 102.4(19) | H(51A)-C(51)-H(51B)  | 109.0     |
| C(45')-C(46')-H(46C) | 111.3     | O(10)-C(52)-C(51)    | 112.6(18) |
| C(47')-C(46')-H(46C) | 111.3     | O(10)-C(52)-H(52A)   | 109.1     |
| C(45')-C(46')-H(46D) | 111.3     | C(51)-C(52)-H(52A)   | 109.1     |
| C(47')-C(46')-H(46D) | 111.3     | O(10)-C(52)-H(52B)   | 109.1     |
| H(46C)-C(46')-H(46D) | 109.2     | C(51)-C(52)-H(52B)   | 109.1     |
| C(48')-C(47')-C(46') | 103.0(17) | H(52A)-C(52)-H(52B)  | 107.8     |
| C(48')-C(47')-H(47C) | 111.2     | C(52')-O(10')-C(49') | 93(3)     |
| C(46')-C(47')-H(47C) | 111.2     | O(10')-C(49')-C(50') | 116(2)    |
| C(48')-C(47')-H(47D) | 111.2     | O(10')-C(49')-H(49C) | 108.3     |
| C(46')-C(47')-H(47D) | 111.2     | C(50')-C(49')-H(49C) | 108.3     |
| H(47C)-C(47')-H(47D) | 109.1     | O(10')-C(49')-H(49D) | 108.3     |
| O(9')-C(48')-C(47')  | 110(2)    | C(50')-C(49')-H(49D) | 108.3     |
| O(9')-C(48')-H(48C)  | 109.7     | H(49C)-C(49')-H(49D) | 107.4     |
| C(47')-C(48')-H(48C) | 109.7     | C(51')-C(50')-C(49') | 95(2)     |
| O(9')-C(48')-H(48D)  | 109.7     | C(51')-C(50')-H(50C) | 112.7     |
| C(47')-C(48')-H(48D) | 109.7     | C(49')-C(50')-H(50C) | 112.7     |
| H(48C)-C(48')-H(48D) | 108.2     | C(51')-C(50')-H(50D) | 112.7     |
| C(49)-O(10)-C(52)    | 99.7(19)  | C(49')-C(50')-H(50D) | 112.7     |
| O(10)-C(49)-C(50)    | 116.0(17) | H(50C)-C(50')-H(50D) | 110.2     |
| O(10)-C(49)-H(49A)   | 108.3     | C(50')-C(51')-C(52') | 101.1(19) |
| C(50)-C(49)-H(49A)   | 108.3     | C(50')-C(51')-H(51C) | 111.6     |
| O(10)-C(49)-H(49B)   | 108.3     | C(52')-C(51')-H(51C) | 111.6     |
| C(50)-C(49)-H(49B)   | 108.3     | C(50')-C(51')-H(51D) | 111.6     |
| H(49A)-C(49)-H(49B)  | 107.4     | C(52')-C(51')-H(51D) | 111.6     |
| C(51)-C(50)-C(49)    | 99.8(13)  | H(51C)-C(51')-H(51D) | 109.4     |
| C(51)-C(50)-H(50A)   | 111.8     | O(10')-C(52')-C(51') | 119(2)    |
| C(49)-C(50)-H(50A)   | 111.8     | O(10')-C(52')-H(52C) | 107.6     |
| C(51)-C(50)-H(50B)   | 111.8     | C(51')-C(52')-H(52C) | 107.6     |
| C(49)-C(50)-H(50B)   | 111.8     | O(10')-C(52')-H(52D) | 107.6     |
| H(50A)-C(50)-H(50B)  | 109.5     | C(51')-C(52')-H(52D) | 107.6     |
| C(50)-C(51)-C(52)    | 103.5(14) | H(52C)-C(52')-H(52D) | 107.0     |
| C(50)-C(51)-H(51A)   | 111.1     |                      |           |

---

Symmetry transformations used to generate equivalent atoms:

#1  $-x+1,-y+1,z$



Table S4. Anisotropic displacement parameters ( $\text{\AA}^2 \times 10^3$ ) for neism18h. The anisotropic displacement factor exponent takes the form:  $-2\pi^2 [ h^2 a^{*2} U_{11} + \dots + 2 h k a^* b^* U_{12} ]$

|     | $U_{11}$ | $U_{22}$ | $U_{33}$ | $U_{23}$ | $U_{13}$ | $U_{12}$ |
|-----|----------|----------|----------|----------|----------|----------|
| Fe1 | 31(1)    | 39(1)    | 50(1)    | 6(1)     | 2(1)     | 4(1)     |
| Fe2 | 39(1)    | 34(1)    | 45(1)    | 1(1)     | 5(1)     | -3(1)    |
| Fe3 | 41(1)    | 40(1)    | 37(1)    | -6(1)    | 4(1)     | 0(1)     |
| Fe4 | 46(1)    | 40(1)    | 36(1)    | 4(1)     | -4(1)    | 2(1)     |
| Fe5 | 29(1)    | 32(1)    | 38(1)    | -2(1)    | 1(1)     | 0(1)     |
| Fe6 | 30(1)    | 29(1)    | 35(1)    | 1(1)     | 1(1)     | 1(1)     |
| Fe7 | 37(1)    | 33(1)    | 34(1)    | -2(1)    | 5(1)     | 2(1)     |
| Fe8 | 36(1)    | 37(1)    | 36(1)    | 7(1)     | 1(1)     | 1(1)     |
| C1  | 34(3)    | 44(4)    | 70(6)    | 13(4)    | -1(4)    | -8(3)    |
| C2  | 50(5)    | 40(4)    | 82(7)    | -7(4)    | 29(5)    | 6(4)     |
| C3  | 47(5)    | 72(6)    | 71(6)    | 22(5)    | -12(5)   | 13(5)    |
| C4  | 37(4)    | 56(5)    | 59(6)    | 2(4)     | 2(4)     | -18(4)   |
| C5  | 62(5)    | 33(4)    | 64(6)    | -13(4)   | 11(5)    | 2(4)     |
| C6  | 62(6)    | 48(5)    | 55(5)    | 17(4)    | 6(4)     | -6(4)    |
| C7  | 40(4)    | 60(5)    | 63(6)    | -15(5)   | 16(4)    | 6(4)     |
| C8  | 60(5)    | 42(4)    | 50(5)    | -15(4)   | 0(4)     | -3(4)    |
| C9  | 61(5)    | 80(7)    | 28(4)    | 2(4)     | 3(4)     | -2(5)    |
| C10 | 52(5)    | 67(6)    | 69(6)    | -7(5)    | -28(5)   | 19(5)    |
| C11 | 62(5)    | 37(4)    | 47(4)    | 19(4)    | 8(4)     | -3(4)    |
| C12 | 80(6)    | 57(5)    | 29(4)    | -4(4)    | 11(4)    | 3(5)     |
| Mg1 | 26(1)    | 24(1)    | 27(1)    | 2(1)     | 1(1)     | -2(1)    |
| Cl1 | 39(1)    | 29(2)    | 57(1)    | -1(3)    | 6(1)     | -10(2)   |
| Br1 | 39(1)    | 29(2)    | 57(1)    | -1(3)    | 6(1)     | -10(2)   |
| O1  | 22(2)    | 26(2)    | 27(2)    | -1(2)    | -1(2)    | -2(2)    |
| C13 | 30(3)    | 33(3)    | 40(4)    | -5(3)    | -3(3)    | 3(3)     |
| C14 | 29(3)    | 37(4)    | 49(4)    | -6(3)    | 2(3)     | -5(3)    |
| C15 | 34(3)    | 27(3)    | 43(4)    | -4(3)    | 3(3)     | 2(3)     |
| C16 | 37(3)    | 27(3)    | 39(4)    | 2(3)     | 3(3)     | 2(3)     |
| O2  | 27(2)    | 30(2)    | 34(2)    | -7(2)    | 5(2)     | -6(2)    |
| C17 | 38(4)    | 33(4)    | 42(4)    | -9(3)    | 7(3)     | -4(3)    |
| C18 | 50(4)    | 34(4)    | 40(4)    | -10(3)   | 9(3)     | 4(3)     |

|     |         |         |         |        |         |        |
|-----|---------|---------|---------|--------|---------|--------|
| C19 | 37(4)   | 43(4)   | 36(4)   | 5(3)   | 10(3)   | 5(3)   |
| C20 | 30(3)   | 35(3)   | 37(4)   | -3(3)  | -1(3)   | -4(3)  |
| O3  | 40(3)   | 32(2)   | 29(2)   | 5(2)   | -1(2)   | 4(2)   |
| C21 | 46(4)   | 35(4)   | 37(4)   | 1(3)   | -1(3)   | 10(3)  |
| C22 | 46(4)   | 48(5)   | 44(4)   | 6(4)   | -3(4)   | 11(4)  |
| C23 | 49(5)   | 41(4)   | 41(4)   | 6(3)   | -13(3)  | 4(4)   |
| C24 | 42(4)   | 42(4)   | 37(4)   | 1(3)   | -1(3)   | 10(3)  |
| O4  | 32(2)   | 32(2)   | 32(2)   | -3(2)  | 8(2)    | -6(2)  |
| C25 | 46(4)   | 29(3)   | 39(4)   | -4(3)  | 5(3)    | 2(3)   |
| C26 | 67(6)   | 42(5)   | 53(5)   | -8(4)  | 32(5)   | 2(4)   |
| C27 | 41(4)   | 73(6)   | 45(5)   | 3(4)   | 9(4)    | -2(4)  |
| C28 | 40(4)   | 47(4)   | 41(4)   | -5(3)  | 12(3)   | -16(4) |
| O5  | 24(2)   | 37(2)   | 29(2)   | 2(2)   | -3(2)   | -2(2)  |
| C29 | 30(3)   | 43(4)   | 54(5)   | -3(4)  | 0(3)    | 1(3)   |
| C30 | 43(5)   | 103(8)  | 51(5)   | 4(6)   | -15(4)  | 2(5)   |
| C31 | 41(4)   | 60(5)   | 41(4)   | 11(4)  | -10(4)  | 4(4)   |
| C32 | 40(4)   | 62(5)   | 29(4)   | -1(4)  | -2(3)   | 4(4)   |
| Mg2 | 28(2)   | 59(2)   | 36(2)   | 0      | 0       | 3(2)   |
| Cl2 | 19(3)   | 74(3)   | 53(2)   | 10(2)  | 1(3)    | -6(3)  |
| Br2 | 19(3)   | 74(3)   | 53(2)   | 10(2)  | 1(3)    | -6(3)  |
| O6  | 33(3)   | 81(4)   | 53(4)   | -20(3) | -7(2)   | 13(3)  |
| C33 | 47(5)   | 113(9)  | 50(5)   | -29(6) | -13(4)  | 14(6)  |
| C34 | 69(7)   | 103(10) | 83(8)   | -39(7) | 2(6)    | -8(7)  |
| C35 | 81(8)   | 92(9)   | 87(8)   | -14(7) | -14(7)  | 30(7)  |
| C36 | 40(5)   | 106(8)  | 58(6)   | -30(6) | -5(4)   | 20(5)  |
| O7  | 44(3)   | 57(4)   | 47(3)   | -7(3)  | 11(3)   | -12(3) |
| C37 | 69(6)   | 53(5)   | 62(6)   | -2(5)  | 14(5)   | -4(5)  |
| C38 | 104(10) | 52(6)   | 99(9)   | 3(6)   | 35(8)   | 5(6)   |
| C39 | 63(6)   | 82(8)   | 72(7)   | -2(6)  | 22(5)   | -1(6)  |
| C40 | 55(5)   | 73(6)   | 48(5)   | -11(5) | 18(4)   | -16(5) |
| O8  | 74(4)   | 70(4)   | 54(4)   | -7(3)  | 11(3)   | 17(4)  |
| C41 | 46(5)   | 65(6)   | 61(6)   | -16(5) | -8(4)   | 5(4)   |
| C42 | 109(9)  | 74(7)   | 54(6)   | -8(5)  | 15(6)   | -34(7) |
| C43 | 66(6)   | 58(6)   | 44(5)   | -11(4) | 3(4)    | 12(5)  |
| C44 | 59(5)   | 53(5)   | 44(4)   | 1(4)   | 5(4)    | 13(4)  |
| O9  | 82(10)  | 94(10)  | 123(12) | -34(9) | -14(11) | 5(9)   |

|      |         |         |         |         |         |         |
|------|---------|---------|---------|---------|---------|---------|
| C45  | 43(8)   | 62(9)   | 107(14) | -10(9)  | -19(9)  | 14(7)   |
| C46  | 59(11)  | 127(15) | 123(15) | -13(13) | -22(11) | -3(10)  |
| C47  | 61(10)  | 111(13) | 99(12)  | 8(12)   | -6(10)  | -23(8)  |
| C48  | 47(14)  | 105(10) | 115(12) | -48(9)  | 18(9)   | -34(9)  |
| O9'  | 82(10)  | 94(10)  | 123(12) | -34(9)  | -14(11) | 5(9)    |
| C45' | 43(8)   | 62(9)   | 107(14) | -10(9)  | -19(9)  | 14(7)   |
| C46' | 59(11)  | 127(15) | 123(15) | -13(13) | -22(11) | -3(10)  |
| C47' | 61(10)  | 111(13) | 99(12)  | 8(12)   | -6(10)  | -23(8)  |
| C48' | 47(14)  | 105(10) | 115(12) | -48(9)  | 18(9)   | -34(9)  |
| O10  | 183(16) | 135(13) | 149(12) | -42(10) | -19(14) | 18(14)  |
| C49  | 168(16) | 57(9)   | 113(14) | -13(10) | 10(13)  | -24(11) |
| C50  | 131(14) | 80(11)  | 133(14) | 31(11)  | 26(13)  | -4(10)  |
| C51  | 134(16) | 84(13)  | 175(15) | 45(12)  | 11(14)  | 39(12)  |
| C52  | 131(15) | 91(13)  | 155(15) | -7(11)  | 6(13)   | 14(11)  |
| O10' | 131(15) | 91(13)  | 155(15) | -7(11)  | 6(13)   | 14(11)  |
| C49' | 134(16) | 84(13)  | 175(15) | 45(12)  | 11(14)  | 39(12)  |
| C50' | 131(14) | 80(11)  | 133(14) | 31(11)  | 26(13)  | -4(10)  |
| C51' | 168(16) | 57(9)   | 113(14) | -13(10) | 10(13)  | -24(11) |
| C52' | 183(16) | 135(13) | 149(12) | -42(10) | -19(14) | 18(14)  |

---

Table S5. Hydrogen coordinates ( $\times 10^4$ ) and isotropic displacement parameters ( $\text{\AA}^2 \times 10^3$ ) for neism18h.

|      | x    | y    | z     | U(eq) |
|------|------|------|-------|-------|
| H13A | 6504 | 3716 | -1336 | 41    |
| H13B | 6262 | 4344 | -581  | 41    |
| H14A | 6168 | 2902 | 392   | 46    |
| H14B | 6170 | 2392 | -686  | 46    |
| H15A | 6758 | 1981 | -567  | 42    |
| H15B | 6610 | 1685 | 503   | 42    |
| H16A | 6810 | 3198 | 1196  | 41    |
| H16B | 7112 | 3011 | 399   | 41    |
| H17A | 6647 | 7306 | 1615  | 45    |
| H17B | 6924 | 6655 | 2244  | 45    |
| H18A | 6328 | 7095 | 3015  | 50    |
| H18B | 6503 | 5996 | 3253  | 50    |
| H19A | 5971 | 5513 | 2573  | 47    |
| H19B | 5990 | 6407 | 1756  | 47    |
| H20A | 6392 | 4560 | 1824  | 41    |
| H20B | 6206 | 5054 | 878   | 41    |
| H21A | 6535 | 7506 | -314  | 47    |
| H21B | 6218 | 6736 | -93   | 47    |
| H22A | 5957 | 7409 | -1420 | 55    |
| H22B | 6312 | 7951 | -1776 | 55    |
| H23A | 6274 | 6685 | -2930 | 52    |
| H23B | 6091 | 5894 | -2180 | 52    |
| H24A | 6664 | 5338 | -2180 | 48    |
| H24B | 6812 | 6496 | -2185 | 48    |
| H25A | 7080 | 4015 | -2032 | 46    |
| H25B | 7319 | 3507 | -1198 | 46    |
| H26A | 7529 | 4211 | -3050 | 65    |
| H26B | 7726 | 3395 | -2356 | 65    |
| H27A | 7986 | 5214 | -2524 | 64    |
| H27B | 7996 | 4670 | -1462 | 64    |

|      |      |      |       |     |
|------|------|------|-------|-----|
| H28A | 7684 | 6164 | -1131 | 51  |
| H28B | 7478 | 6102 | -2156 | 51  |
| H29A | 7816 | 5462 | 615   | 51  |
| H29B | 7767 | 4297 | 249   | 51  |
| H30A | 8082 | 3845 | 1564  | 79  |
| H30B | 8032 | 4957 | 2064  | 79  |
| H31A | 7678 | 4011 | 3046  | 57  |
| H31B | 7568 | 3251 | 2166  | 57  |
| H32A | 7095 | 4362 | 2242  | 52  |
| H32B | 7342 | 5344 | 2431  | 52  |
| H33A | 4991 | 3950 | -2766 | 84  |
| H33B | 4651 | 3847 | -2081 | 84  |
| H34A | 4878 | 2240 | -2873 | 102 |
| H34B | 4761 | 2170 | -1742 | 102 |
| H35A | 5323 | 1657 | -1505 | 104 |
| H35B | 5457 | 2221 | -2486 | 104 |
| H36A | 5466 | 2994 | -645  | 82  |
| H36B | 5607 | 3547 | -1620 | 82  |
| H37A | 5112 | 7395 | 415   | 73  |
| H37B | 5305 | 6885 | 1339  | 73  |
| H38A | 4680 | 8055 | 1354  | 102 |
| H38B | 5000 | 8124 | 2116  | 102 |
| H39A | 4844 | 6624 | 2882  | 87  |
| H39B | 4465 | 7082 | 2618  | 87  |
| H40A | 4656 | 5323 | 1957  | 70  |
| H40B | 4399 | 6045 | 1338  | 70  |
| H41A | 7222 | 4774 | 4839  | 69  |
| H41B | 6862 | 4900 | 4260  | 69  |
| H42A | 6914 | 5206 | 6116  | 95  |
| H42B | 6619 | 5762 | 5459  | 95  |
| H43A | 6915 | 7217 | 6005  | 67  |
| H43B | 7284 | 6624 | 6032  | 67  |
| H44A | 6915 | 7328 | 4356  | 63  |
| H44B | 7325 | 7429 | 4562  | 63  |
| H45A | 5509 | 5064 | 4946  | 85  |
| H45B | 5199 | 5845 | 5215  | 85  |

|      |      |       |      |     |
|------|------|-------|------|-----|
| H46A | 5920 | 6227  | 5283 | 123 |
| H46B | 5629 | 6542  | 6083 | 123 |
| H47A | 5429 | 7880  | 5156 | 108 |
| H47B | 5819 | 7867  | 4733 | 108 |
| H48A | 5255 | 7522  | 3721 | 107 |
| H48B | 5646 | 7324  | 3352 | 107 |
| H45C | 5438 | 4869  | 4131 | 85  |
| H45D | 5092 | 5433  | 4509 | 85  |
| H46C | 5661 | 5246  | 5496 | 123 |
| H46D | 5350 | 6032  | 5754 | 123 |
| H47C | 5753 | 7280  | 5399 | 108 |
| H47D | 5986 | 6505  | 4750 | 108 |
| H48C | 5418 | 7651  | 4204 | 107 |
| H48D | 5747 | 7314  | 3558 | 107 |
| H49A | 6224 | 9374  | -458 | 135 |
| H49B | 6331 | 10217 | 334  | 135 |
| H50A | 5803 | 10901 | 303  | 137 |
| H50B | 5713 | 10142 | -600 | 137 |
| H51A | 5382 | 9265  | 426  | 157 |
| H51B | 5534 | 9887  | 1354 | 157 |
| H52A | 5796 | 8391  | 1638 | 151 |
| H52B | 5791 | 8070  | 507  | 151 |
| H49C | 5527 | 10495 | 932  | 157 |
| H49D | 5220 | 9671  | 911  | 157 |
| H50C | 5423 | 8962  | -562 | 137 |
| H50D | 5461 | 10192 | -721 | 137 |
| H51C | 6037 | 10182 | -315 | 135 |
| H51D | 6017 | 9014  | -710 | 135 |
| H52C | 6042 | 8400  | 770  | 187 |
| H52D | 6142 | 9526  | 1128 | 187 |

---

Table S6. Torsion angles [°] for neism18h.

|                 |           |                     |           |
|-----------------|-----------|---------------------|-----------|
| C16-O1-C13-C14  | 16.4(7)   | C30-C31-C32-O5      | 40.5(9)   |
| Mg1-O1-C13-C14  | -162.8(4) | C36-O6-C33-C34      | 38.1(11)  |
| O1-C13-C14-C15  | -37.3(7)  | Mg2-O6-C33-C34      | -140.1(8) |
| C13-C14-C15-C16 | 43.2(7)   | O6-C33-C34-C35      | -38.0(12) |
| C13-O1-C16-C15  | 10.6(7)   | C33-C34-C35-C36     | 24.3(14)  |
| Mg1-O1-C16-C15  | -170.2(4) | C33-O6-C36-C35      | -22.8(12) |
| C14-C15-C16-O1  | -33.9(7)  | Mg2-O6-C36-C35      | 155.5(8)  |
| C20-O2-C17-C18  | 10.6(8)   | C34-C35-C36-O6      | -1.2(14)  |
| Mg1-O2-C17-C18  | -174.0(4) | C40-O7-C37-C38      | -17.0(11) |
| O2-C17-C18-C19  | -31.8(7)  | Mg2-O7-C37-C38      | 166.1(7)  |
| C17-C18-C19-C20 | 40.6(7)   | O7-C37-C38-C39      | 33.4(13)  |
| C17-O2-C20-C19  | 15.3(7)   | C37-C38-C39-C40     | -35.8(13) |
| Mg1-O2-C20-C19  | -160.1(4) | C37-O7-C40-C39      | -6.7(11)  |
| C18-C19-C20-O2  | -34.6(7)  | Mg2-O7-C40-C39      | 170.1(7)  |
| C24-O3-C21-C22  | 12.4(8)   | C38-C39-C40-O7      | 27.1(12)  |
| Mg1-O3-C21-C22  | 166.4(5)  | C44-O8-C41-C42      | 1.3(11)   |
| O3-C21-C22-C23  | 13.5(8)   | O8-C41-C42-C43      | -22.3(11) |
| C21-C22-C23-C24 | -32.9(8)  | C41-C42-C43-C44     | 32.6(10)  |
| C21-O3-C24-C23  | -33.4(8)  | C41-O8-C44-C43      | 21.8(10)  |
| Mg1-O3-C24-C23  | 174.2(5)  | C42-C43-C44-O8      | -34.2(10) |
| C22-C23-C24-O3  | 41.1(8)   | C48-O9-C45-C46      | -32(4)    |
| C28-O4-C25-C26  | 8.3(8)    | O9-C45-C46-C47      | 34(3)     |
| Mg1-O4-C25-C26  | -172.0(5) | C45-C46-C47-C48     | -27(3)    |
| O4-C25-C26-C27  | 16.9(9)   | C45-O9-C48-C47      | 14(4)     |
| C25-C26-C27-C28 | -34.1(9)  | C46-C47-C48-O9      | 9(4)      |
| C25-O4-C28-C27  | -30.2(8)  | C48'-O9'-C45'-C46'  | -2(7)     |
| Mg1-O4-C28-C27  | 150.1(5)  | O9'-C45'-C46'-C47'  | -13(5)    |
| C26-C27-C28-O4  | 39.6(8)   | C45'-C46'-C47'-C48' | 22(5)     |
| C32-O5-C29-C30  | 10.4(9)   | C45'-O9'-C48'-C47'  | 17(7)     |
| Mg1-O5-C29-C30  | 172.0(6)  | C46'-C47'-C48'-O9'  | -24(6)    |
| O5-C29-C30-C31  | 15.1(10)  | C52-O10-C49-C50     | 22(3)     |
| C29-C30-C31-C32 | -33.3(10) | O10-C49-C50-C51     | -7(3)     |
| C29-O5-C32-C31  | -31.6(8)  | C49-C50-C51-C52     | -11(3)    |
| Mg1-O5-C32-C31  | 168.4(5)  | C49-O10-C52-C51     | -30(3)    |

|                     |        |                     |        |
|---------------------|--------|---------------------|--------|
| C50-C51-C52-O10     | 27(4)  | C49'-C50'-C51'-C52' | 27(5)  |
| C52'-O10'-C49'-C50' | 35(6)  | C49'-O10'-C52'-C51' | -13(7) |
| O10'-C49'-C50'-C51' | -43(5) | C50'-C51'-C52'-O10' | -11(8) |

---

Symmetry transformations used to generate equivalent atoms:

#1 -x+1,-y+1,z

#### 4. References

1. Cahiez, G.; Avedissian, H., *Synthesis* **1998**, 1199-1205.
2. *APEX3*, version 2015.9-0; Bruker AXS: Madison, WI, 2015.
3. Sheldrick, G. M. *SADABS*, version 2014/5; *J. Appl. Cryst.* **2015**, *48*, 3-10.
4. *SAINT*, version 8.34A; Bruker AXS: Madison, WI, 2013.
5. Sheldrick, G. M. *SHELXT-2014/5*; University of Göttingen: Göttingen, Germany, 2014.
6. Sheldrick, G. M. *SHELXL-2014/7*; *Acta. Cryst.* **2015**, *C71*, 3-8.
7. Dawkins, G. M.; Green, M.; Orpen, A. G.; Stone, F. G. A. *J. Chem. Soc., Chem. Commun.* **1982**, 41-43.
